# Supplementary material for: Mismatch repair protein MLH1 suppresses replicative stress in BRCA2-deficient breast tumors
Source: JCI journal article supplement (doi:10.1172/jci173718), 2024-01-25

Full unedited blot Figure 1F

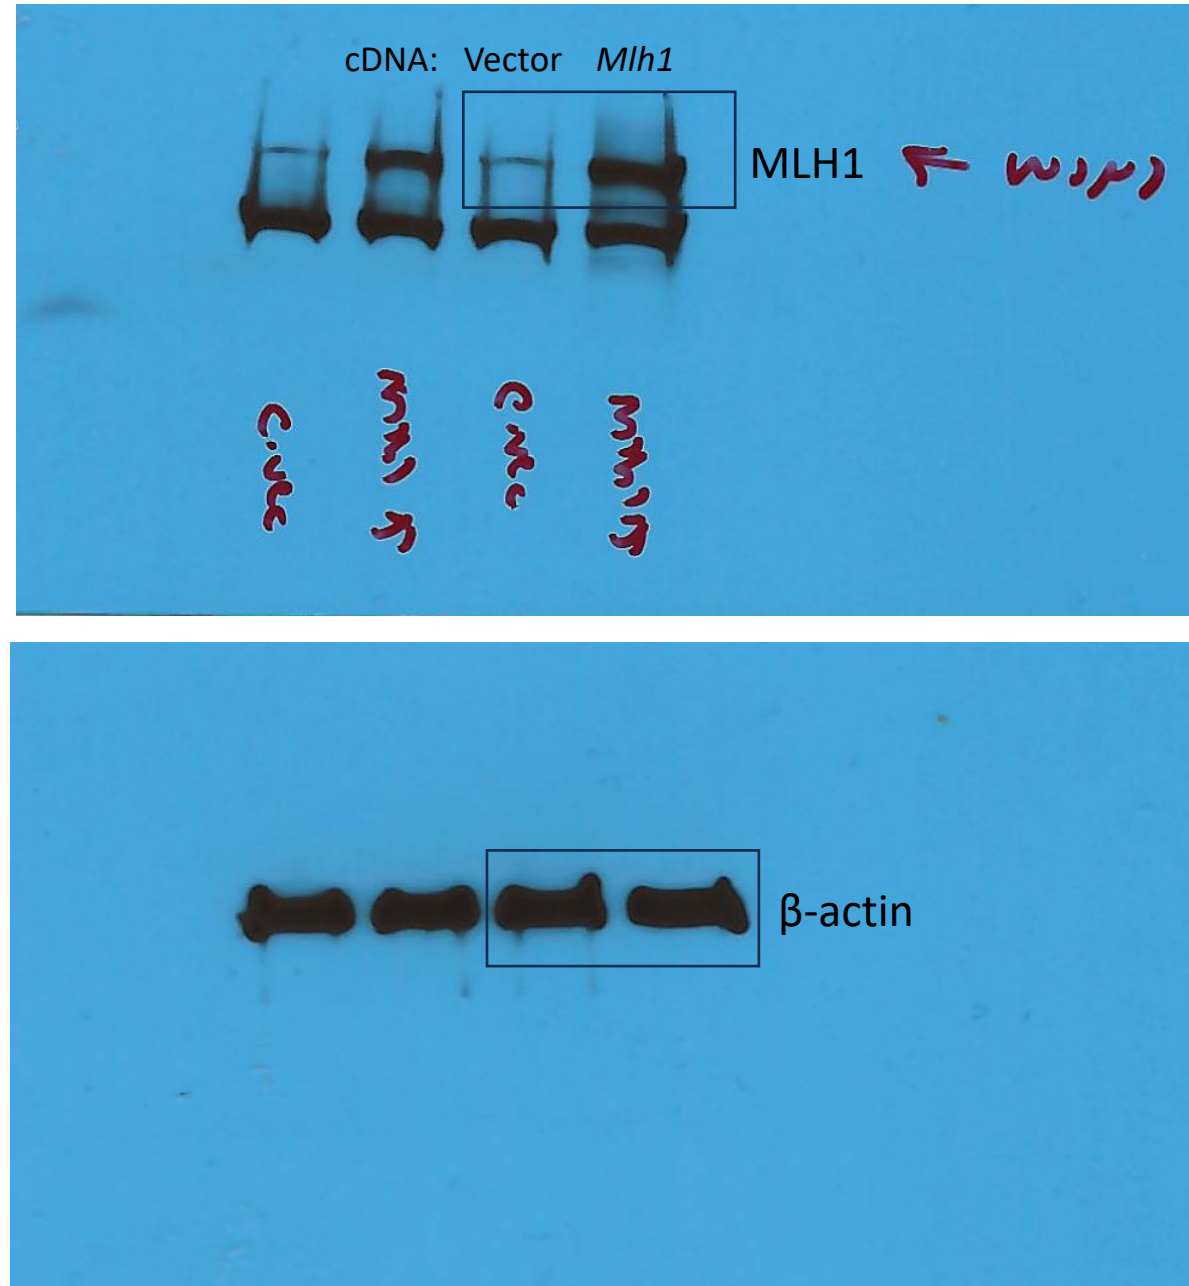

Full unedited blot Figure 1G

cDNA: Vector

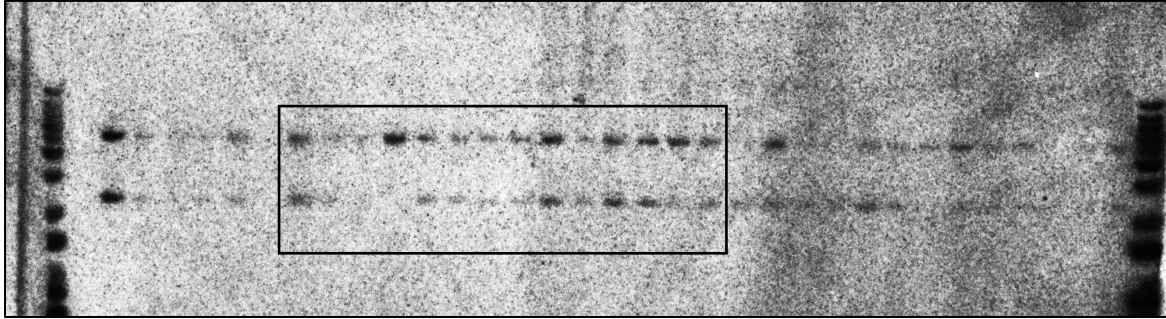

cDNA: *Mlh1*

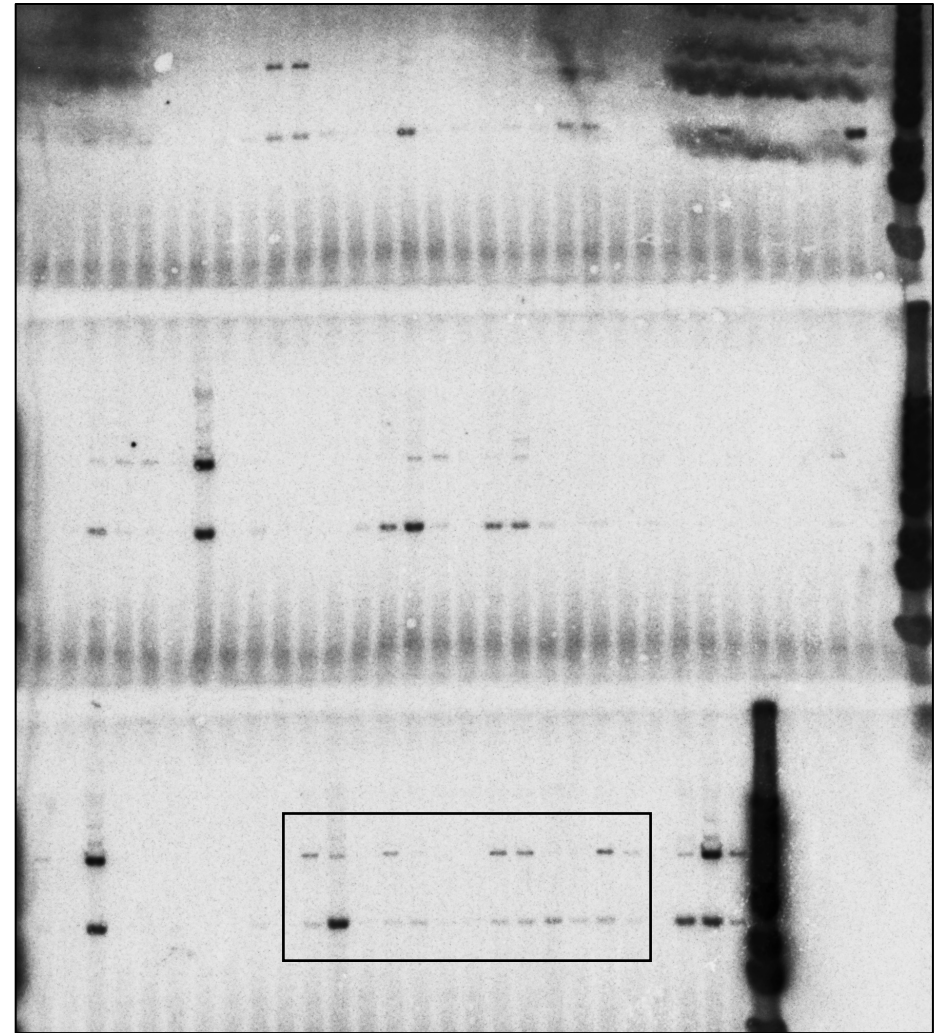

Full unedited blot for Supplemental Figure 1A

DMSO

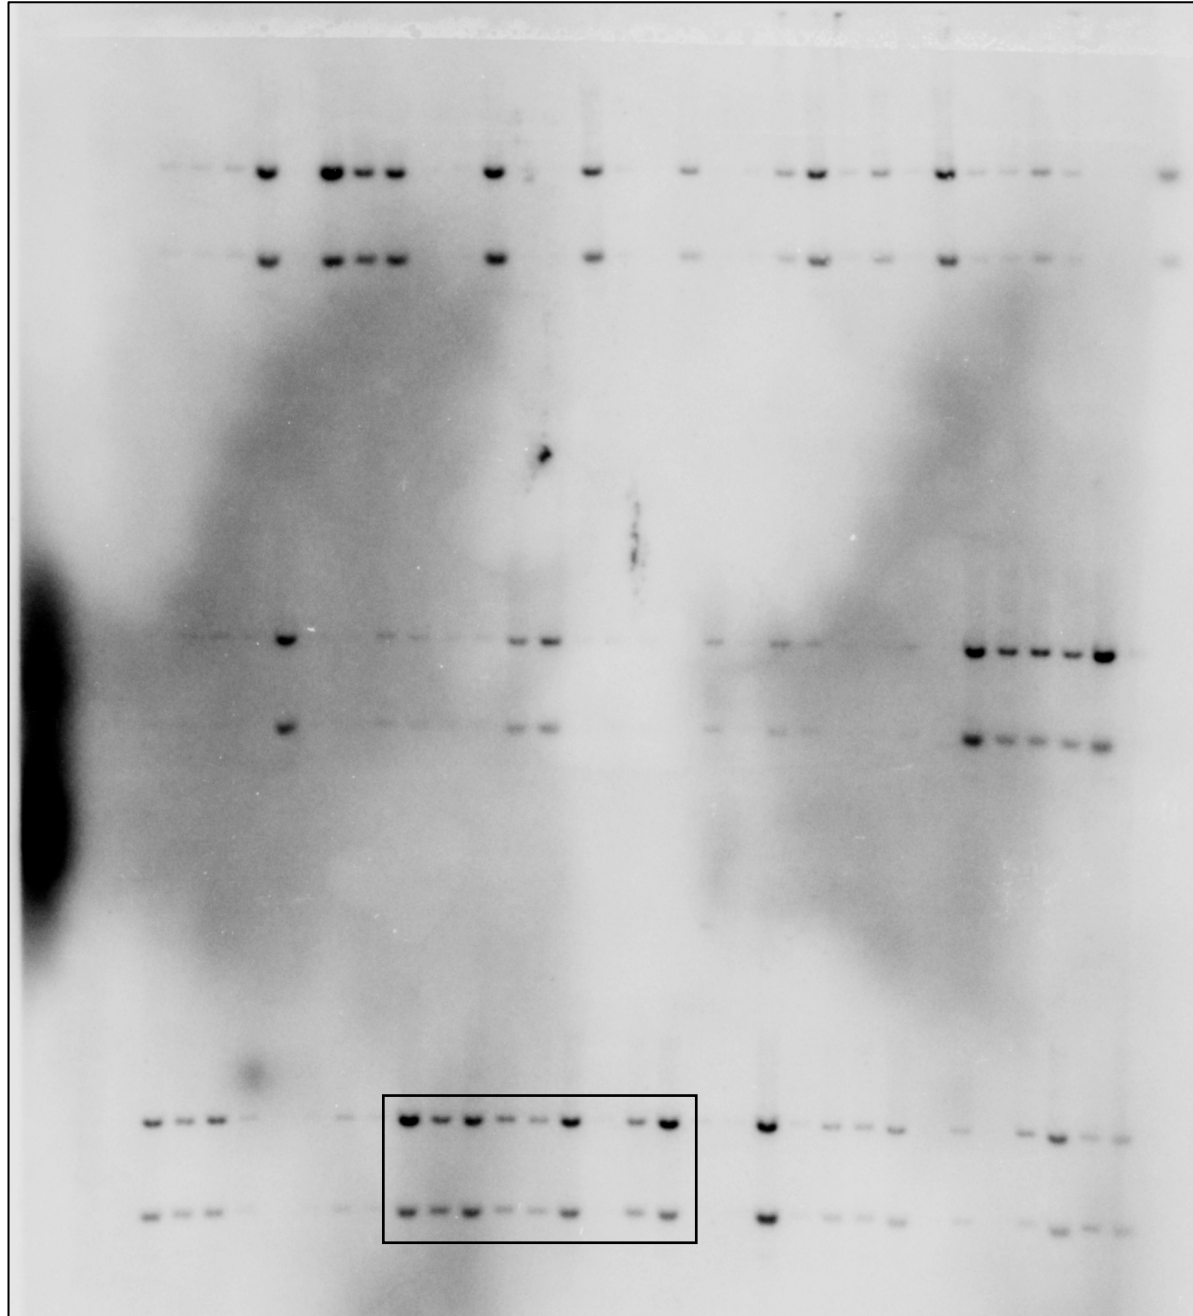

Full unedited blot for Supplemental Figure 1A

Mirin#1

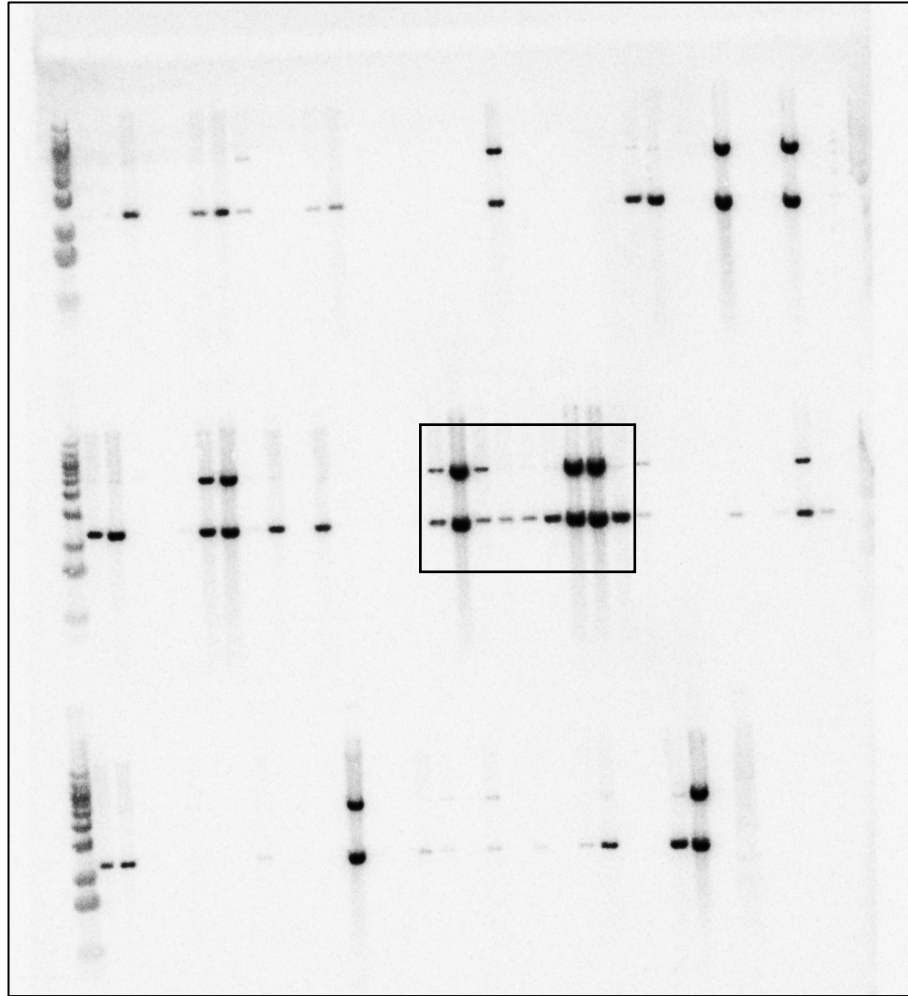

Mirin#2

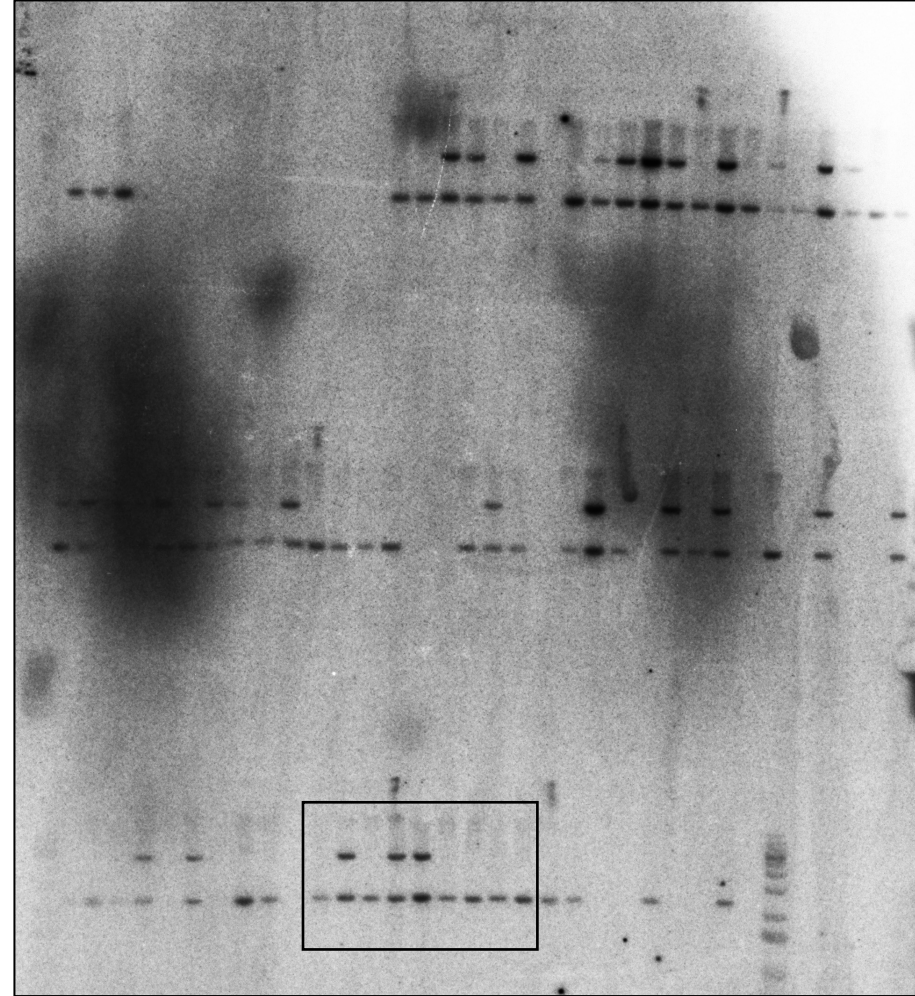



Full unedited blot for Supplemental Figure 1D

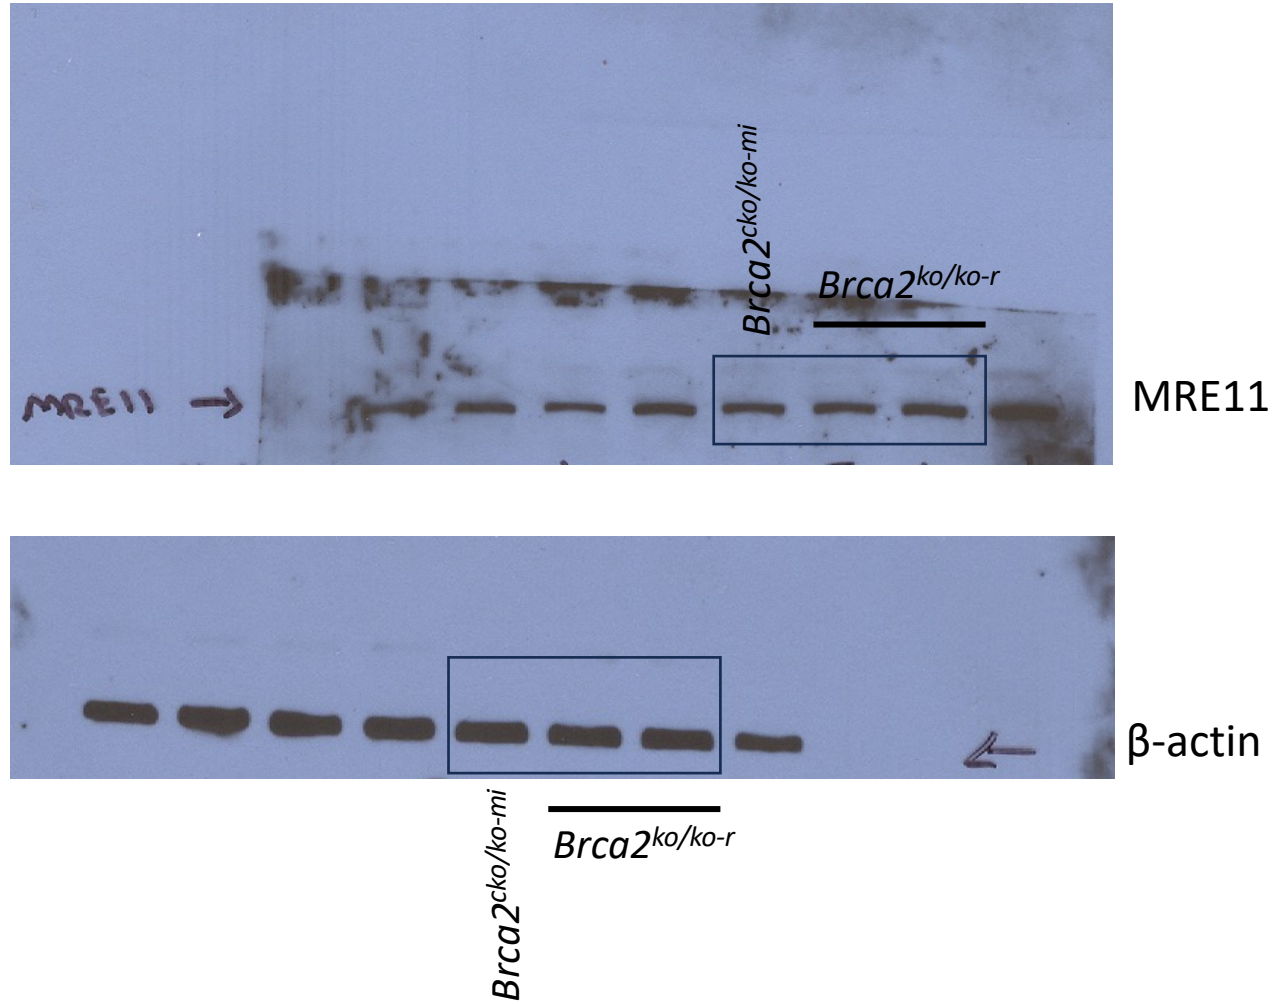

# Full unedited blot for Supplemental Figure 1E

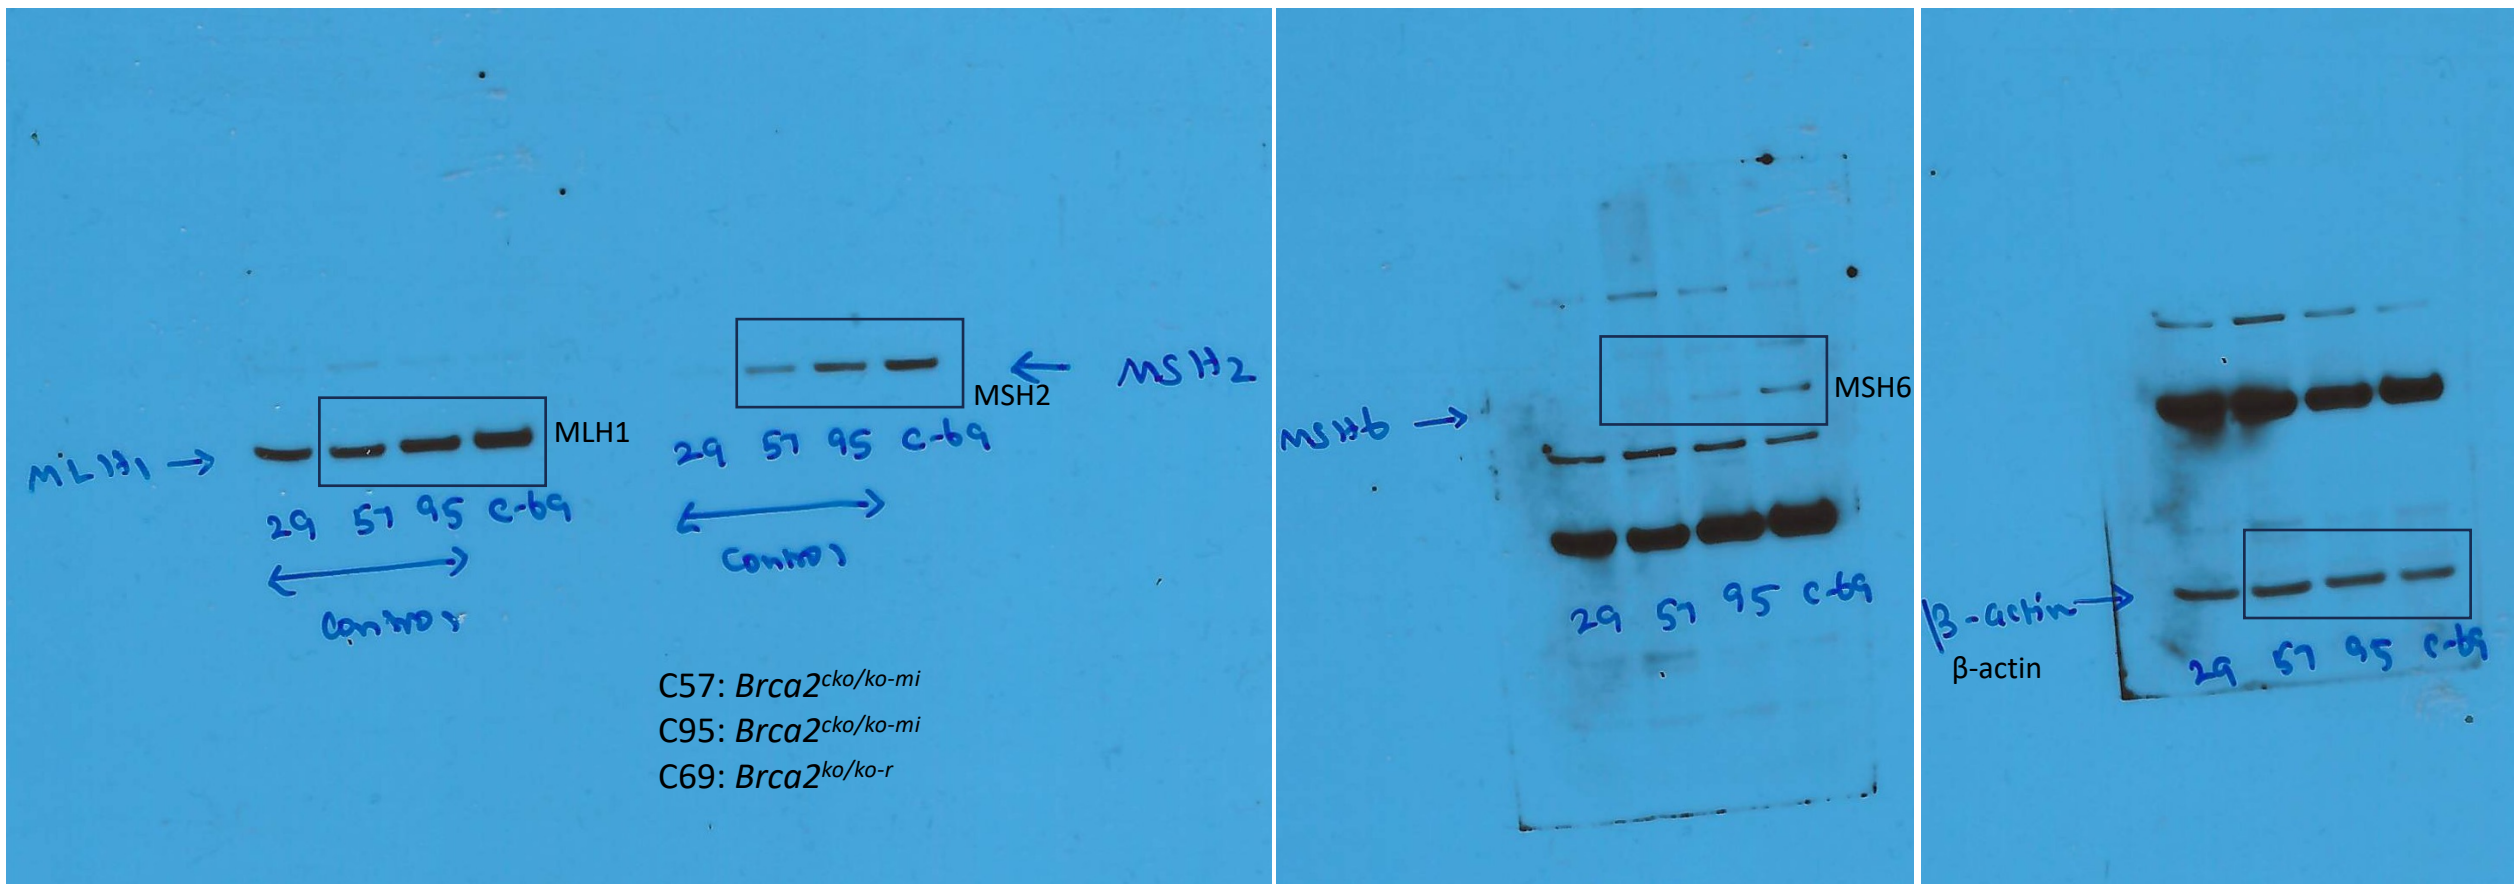

Full unedited blot for Supplemental Figure 2A

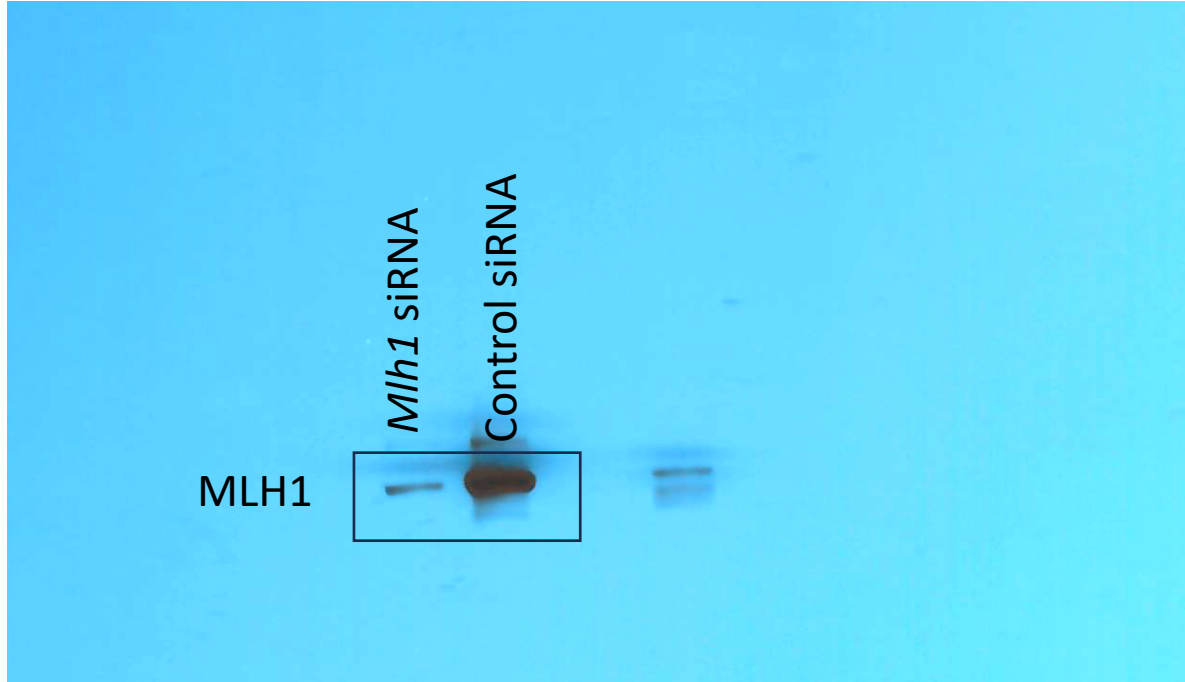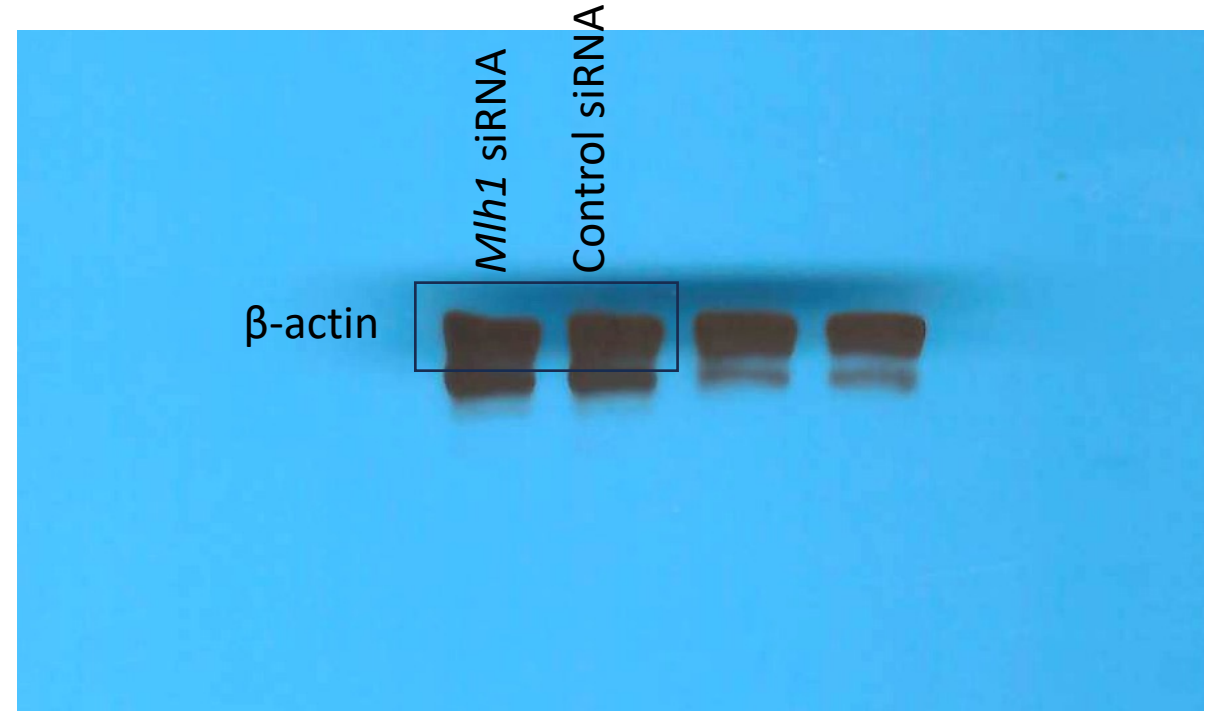

Full unedited blot for Supplemental Figure 2D

*Mlh1* siRNA: DMSO

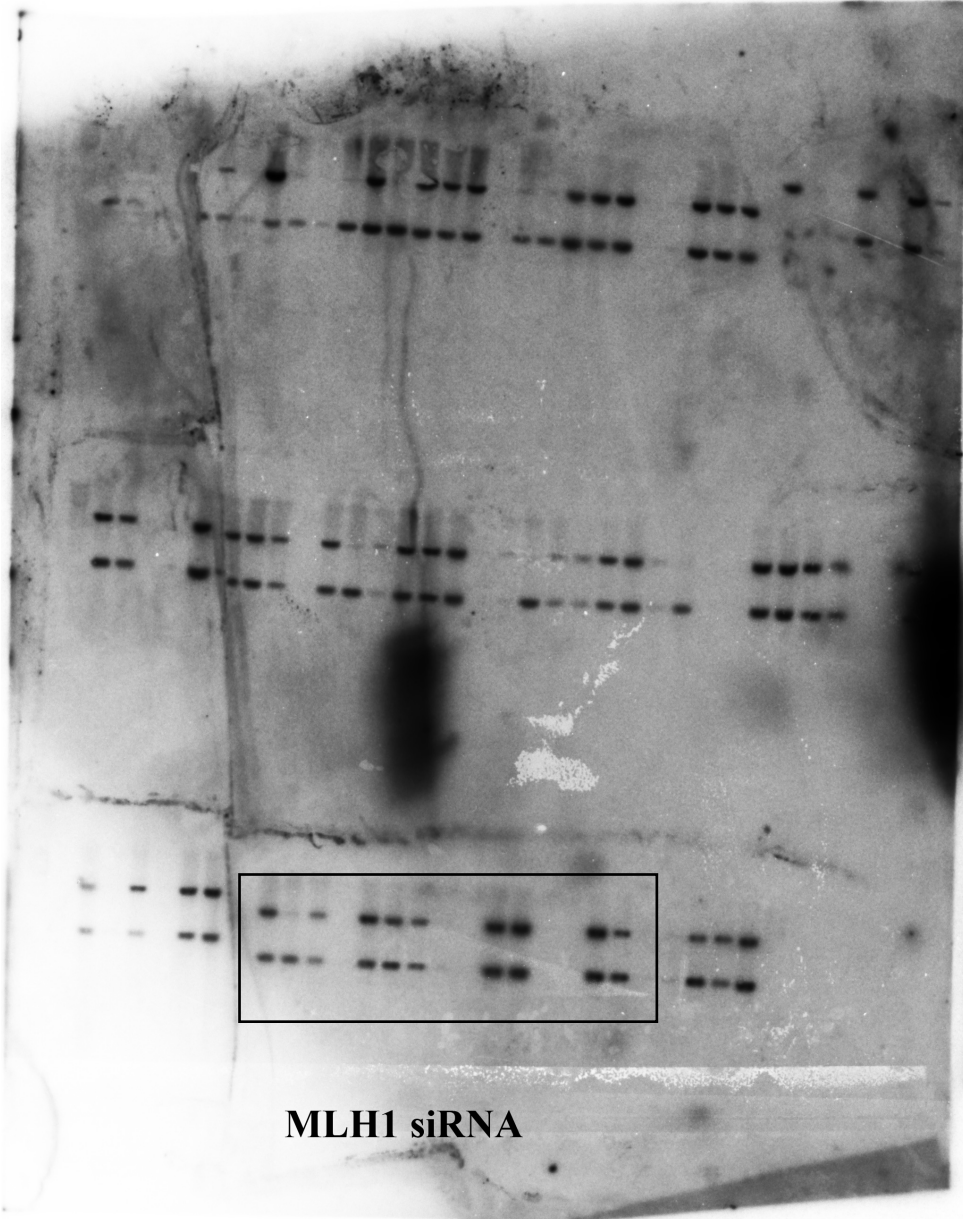

Control siRNA: DMSO

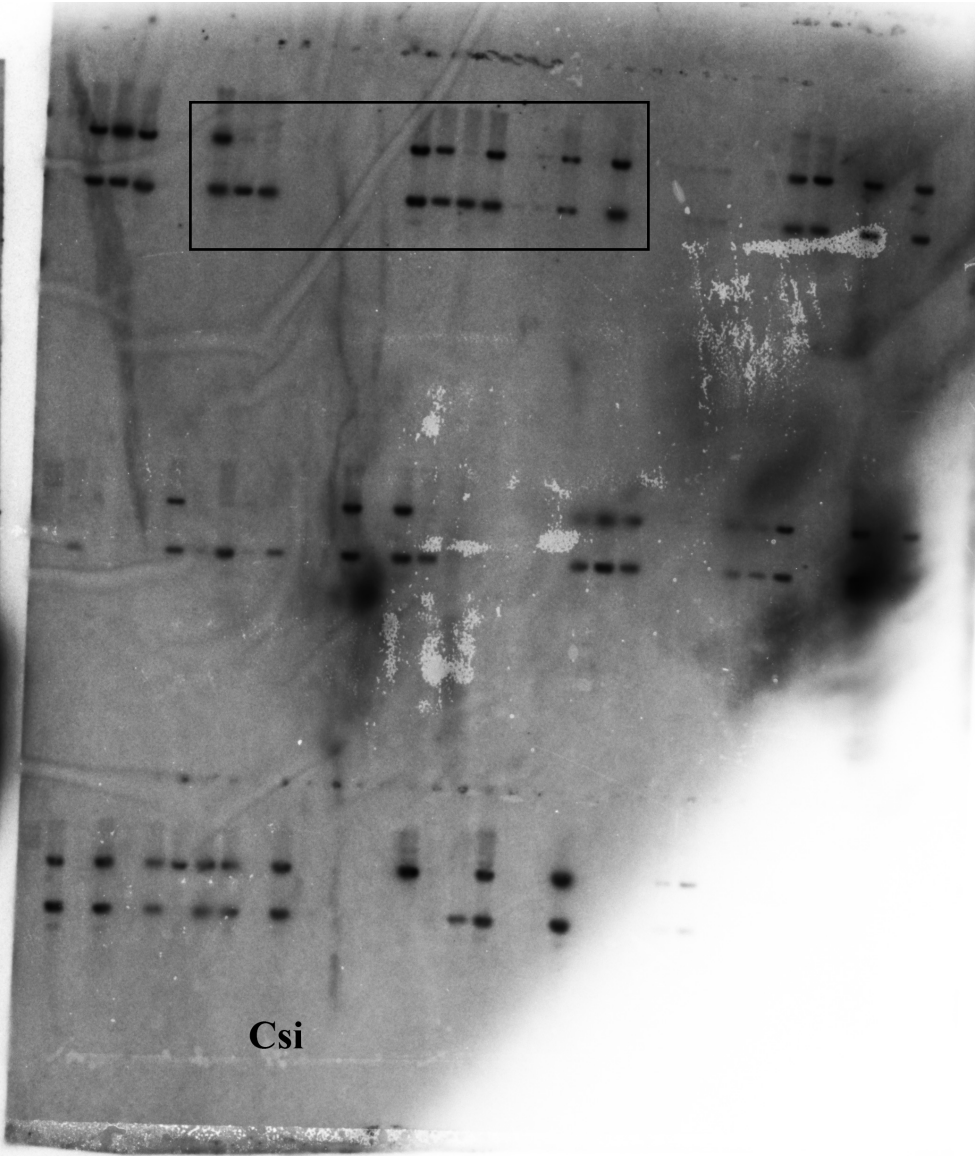



Full unedited blot for Supplemental Figure 2D

*Mlh1* siRNA: Olaparib

Control siRNA: Olaparib

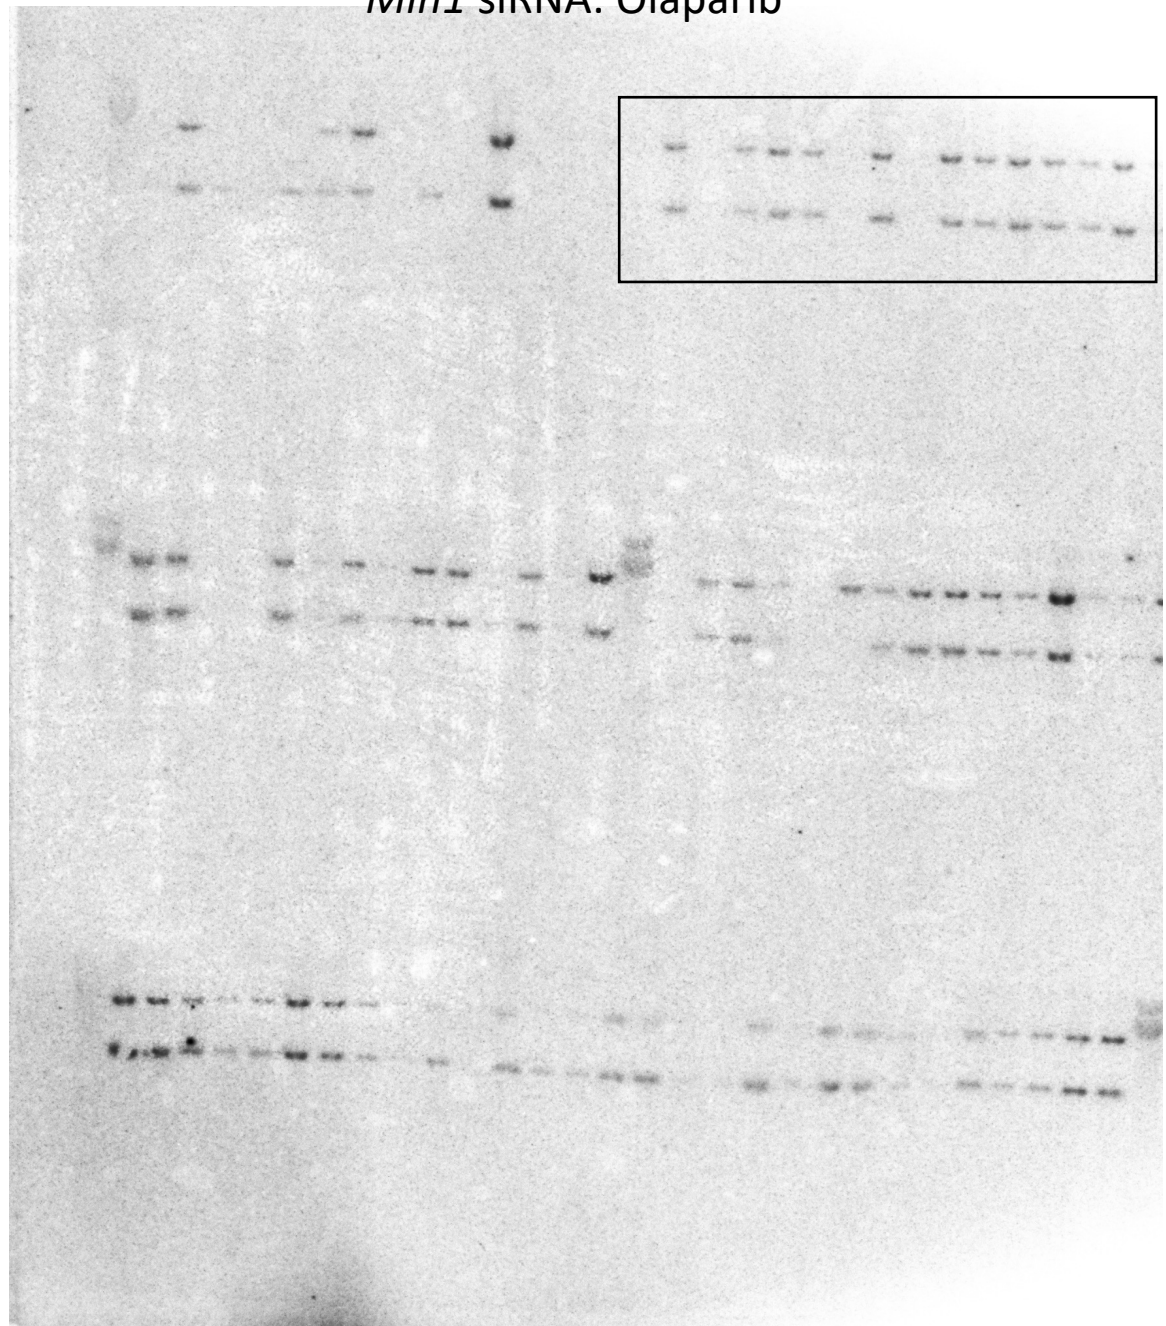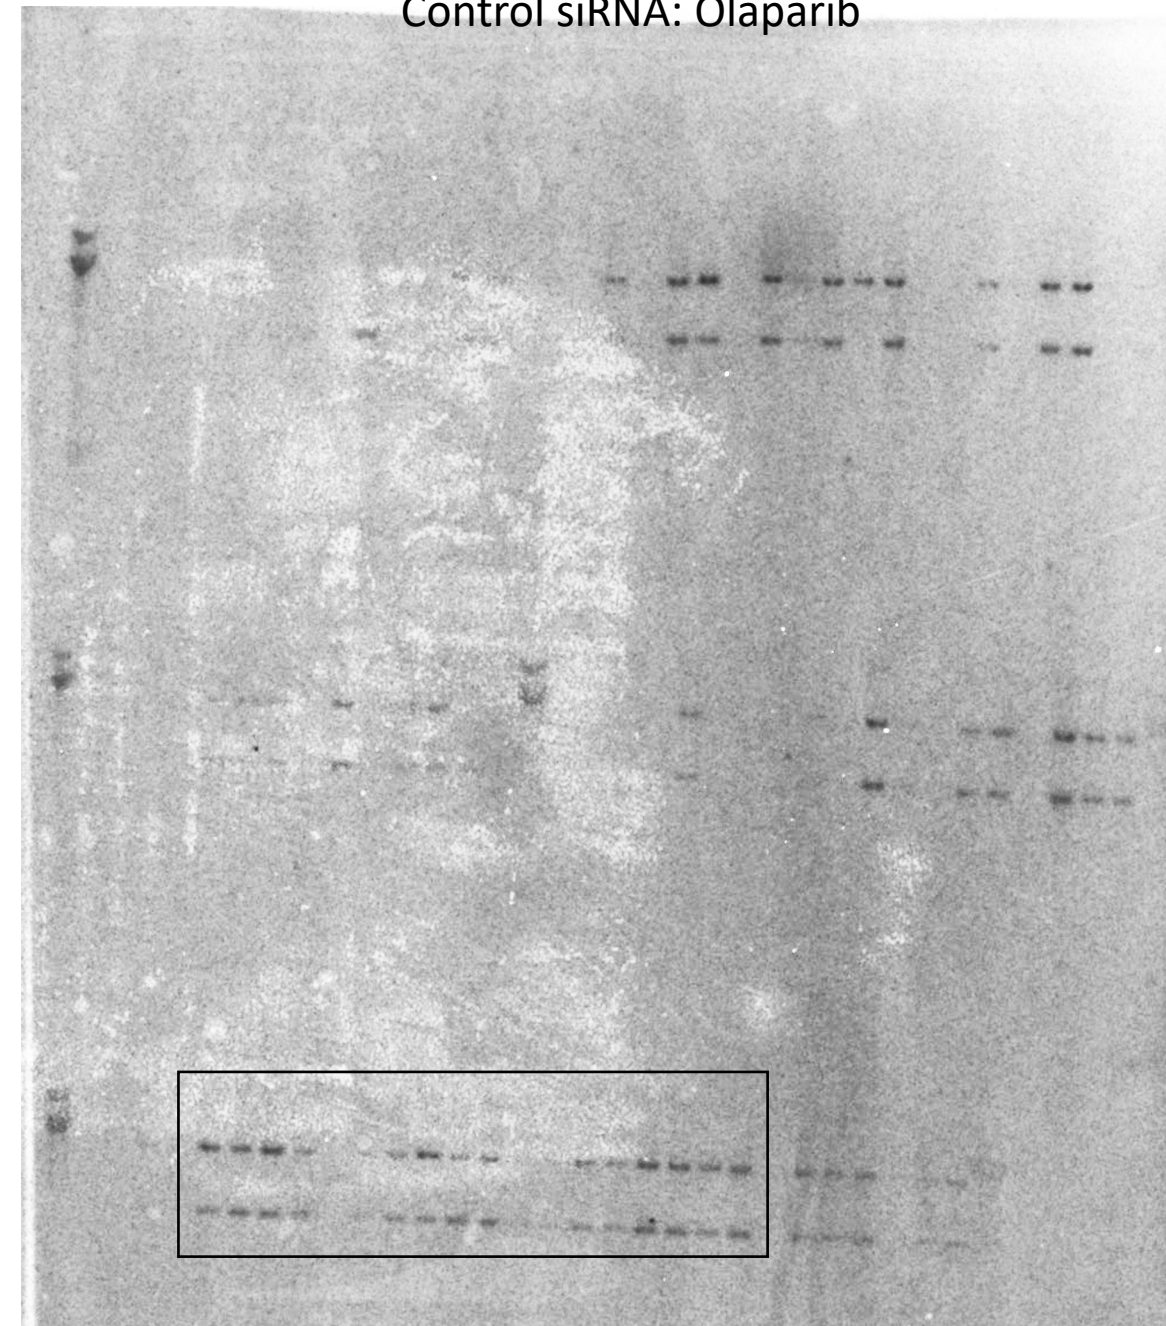



Full unedited blot for Supplemental Figure 2E

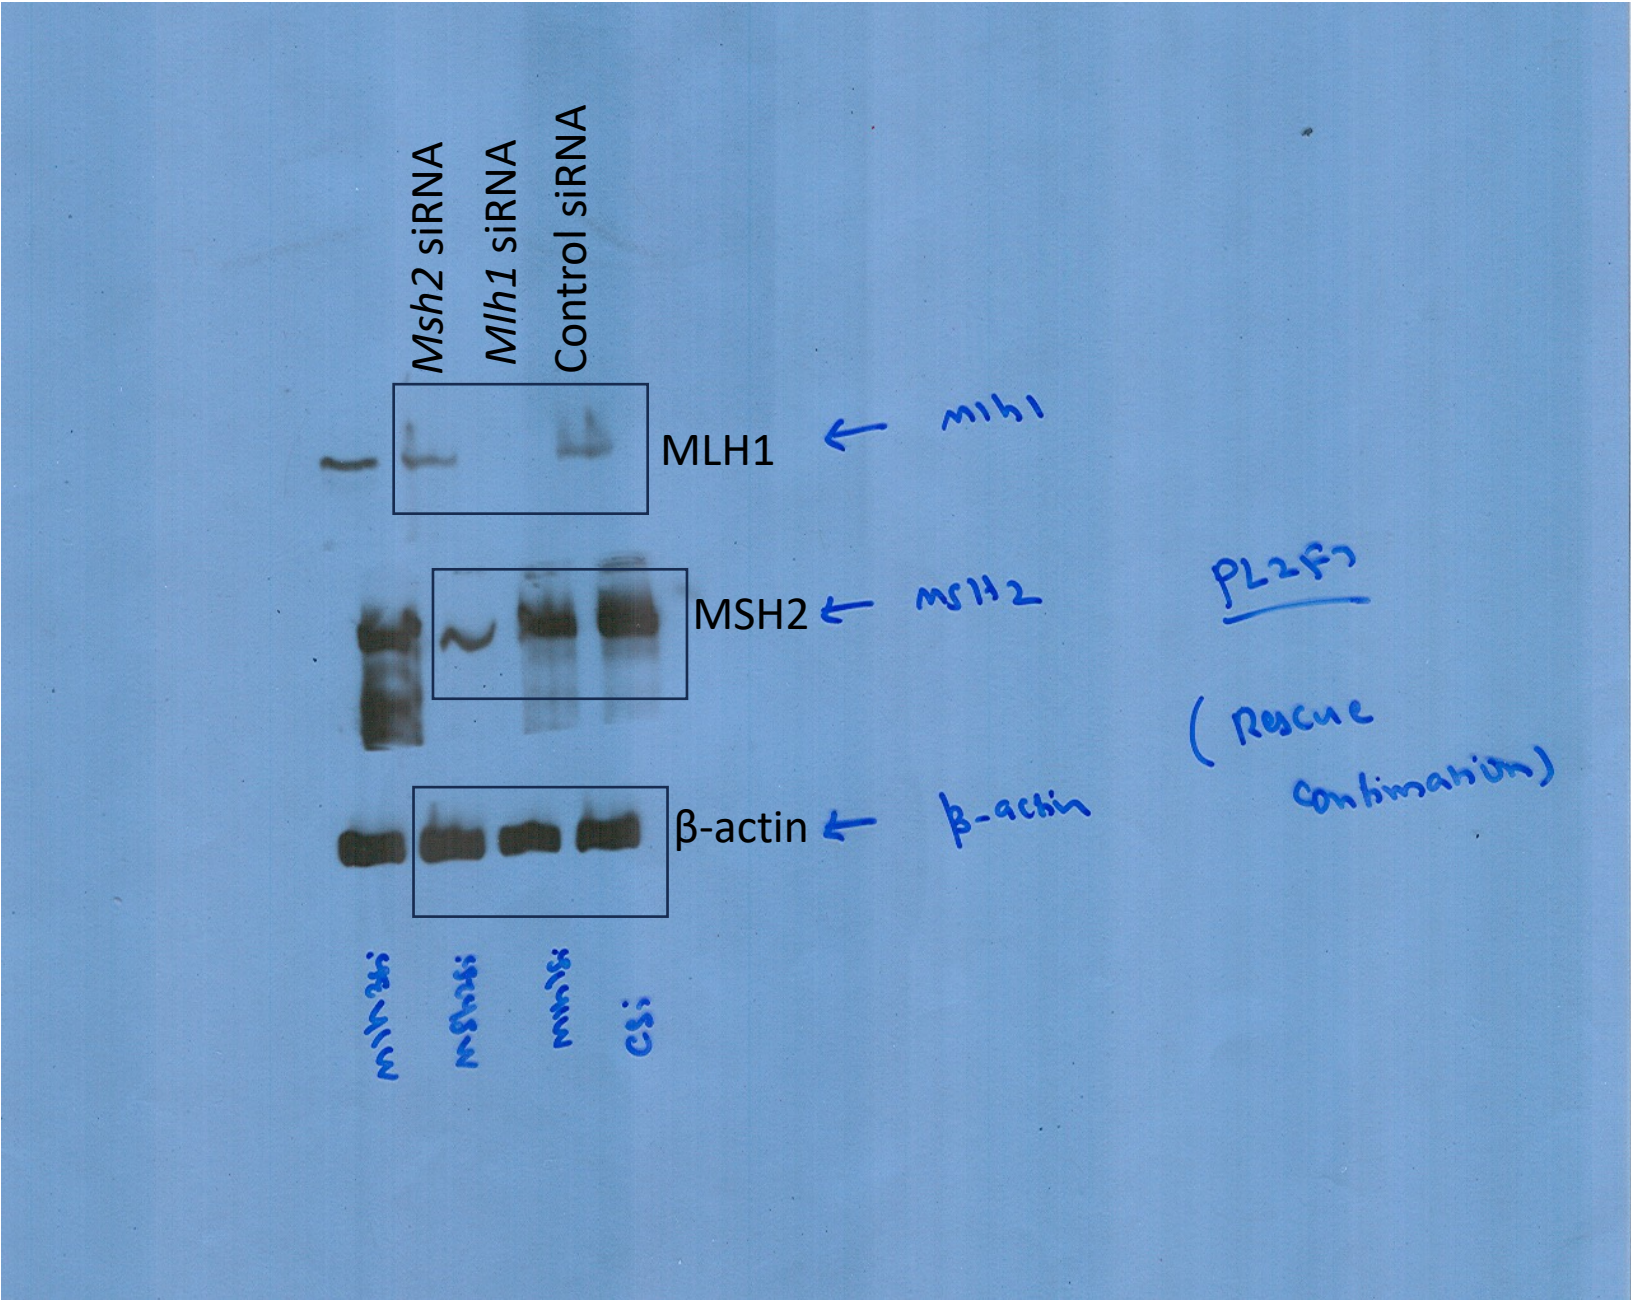

Full unedited blot for Figure 2D

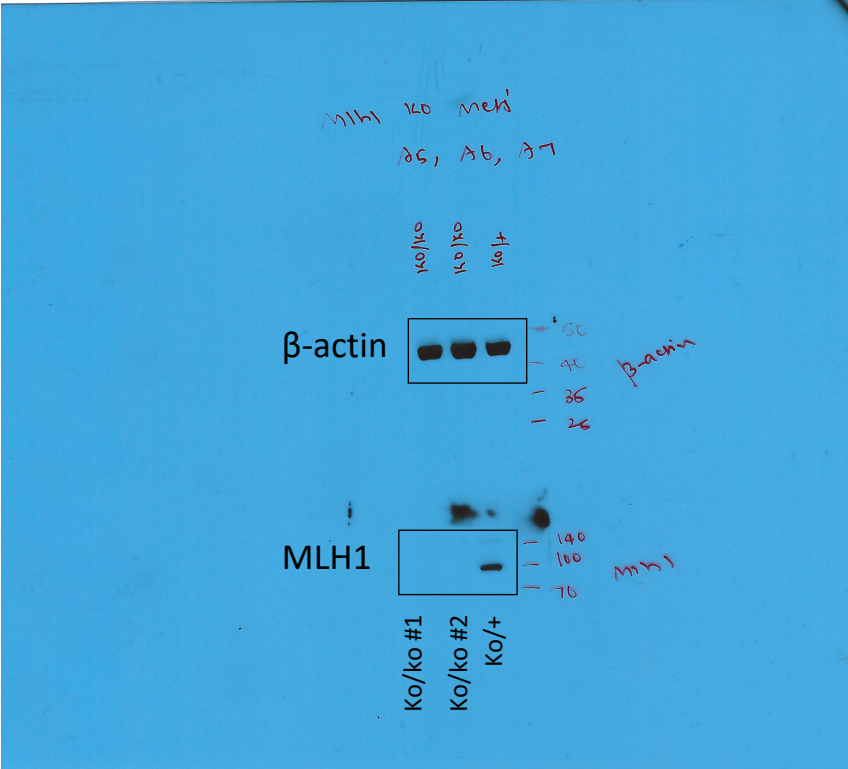

# Full unedited blot for Supplemental Figure 4F

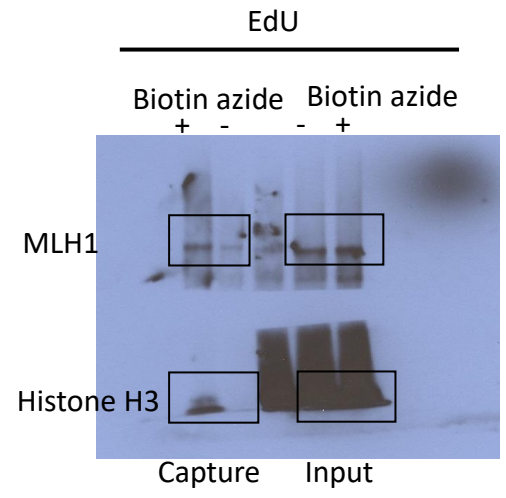

Full unedited blot for Figure 3C

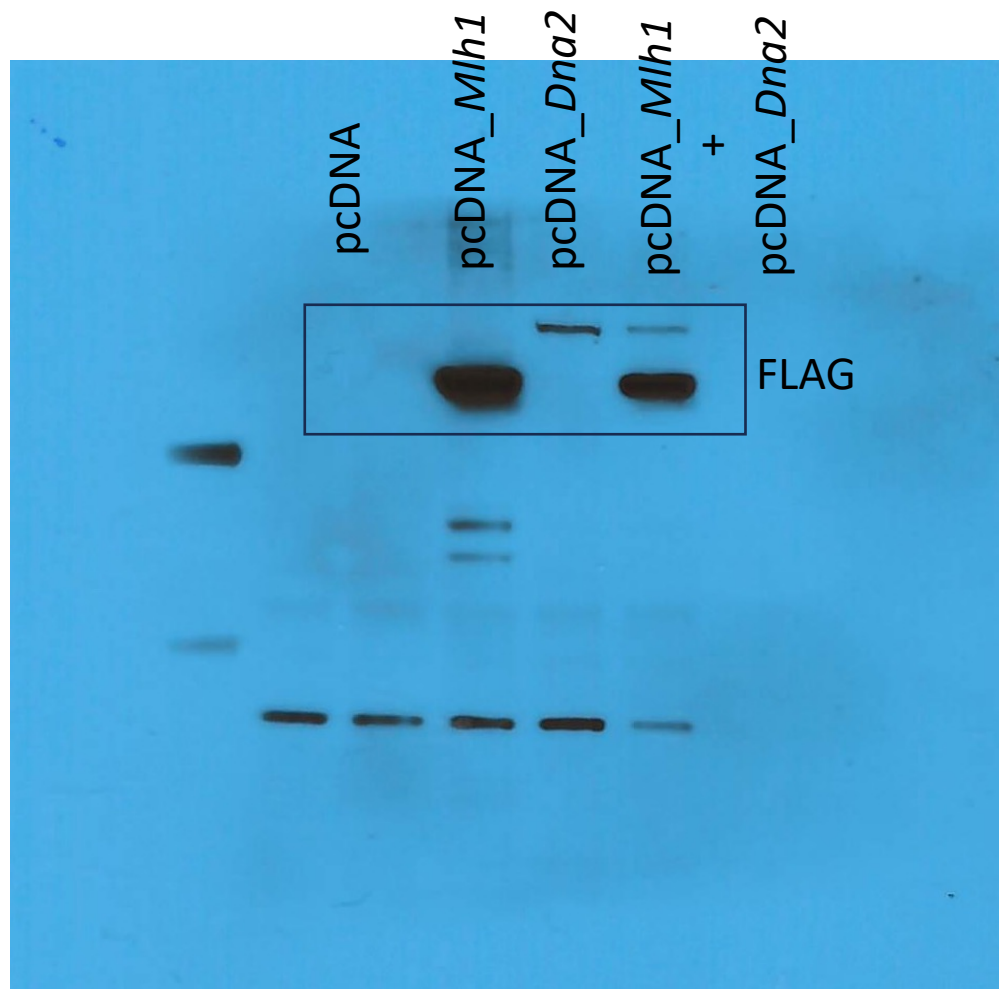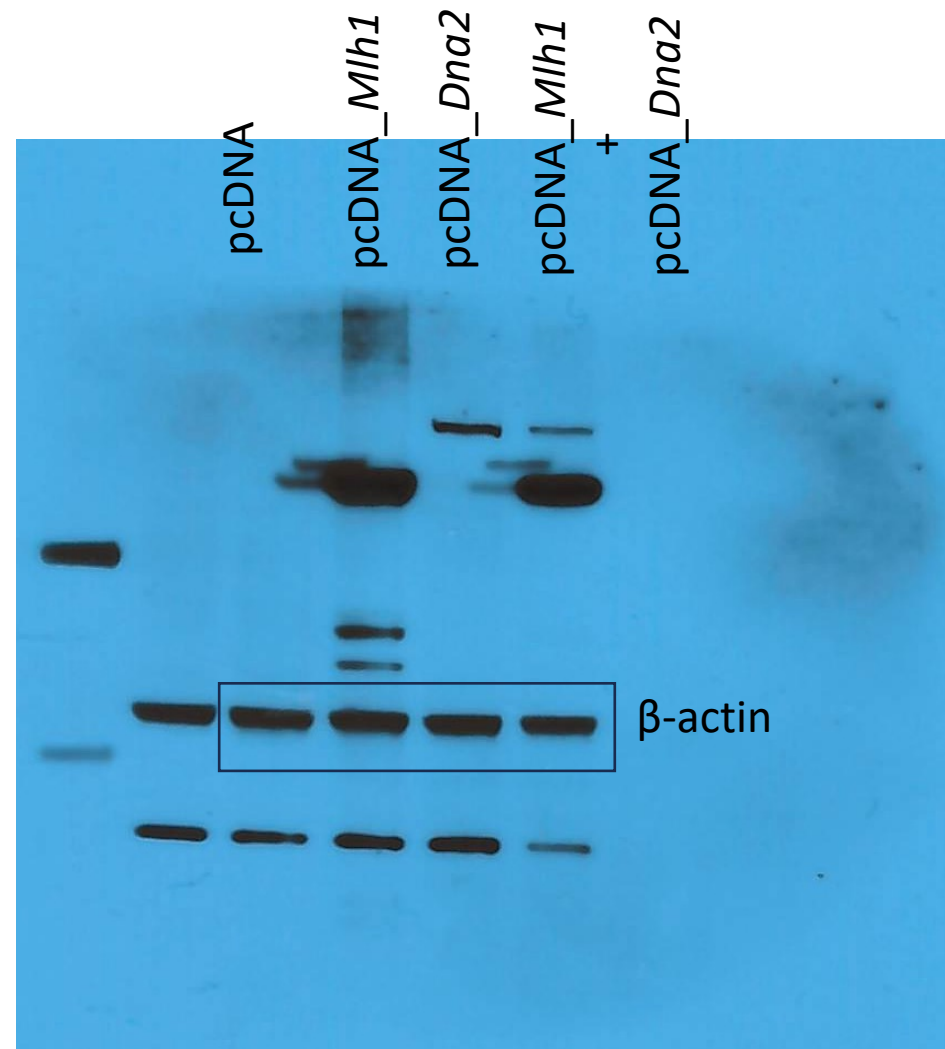



Full unedited blot for Figure 3F

|   |   |   |   |   |   |                    |
|---|---|---|---|---|---|--------------------|
| - | + | + | + | + | + | RNA flap substrate |
| - | + | + | - | + | + | MLH1               |
| - | - | - | + | + | + | FEN1               |

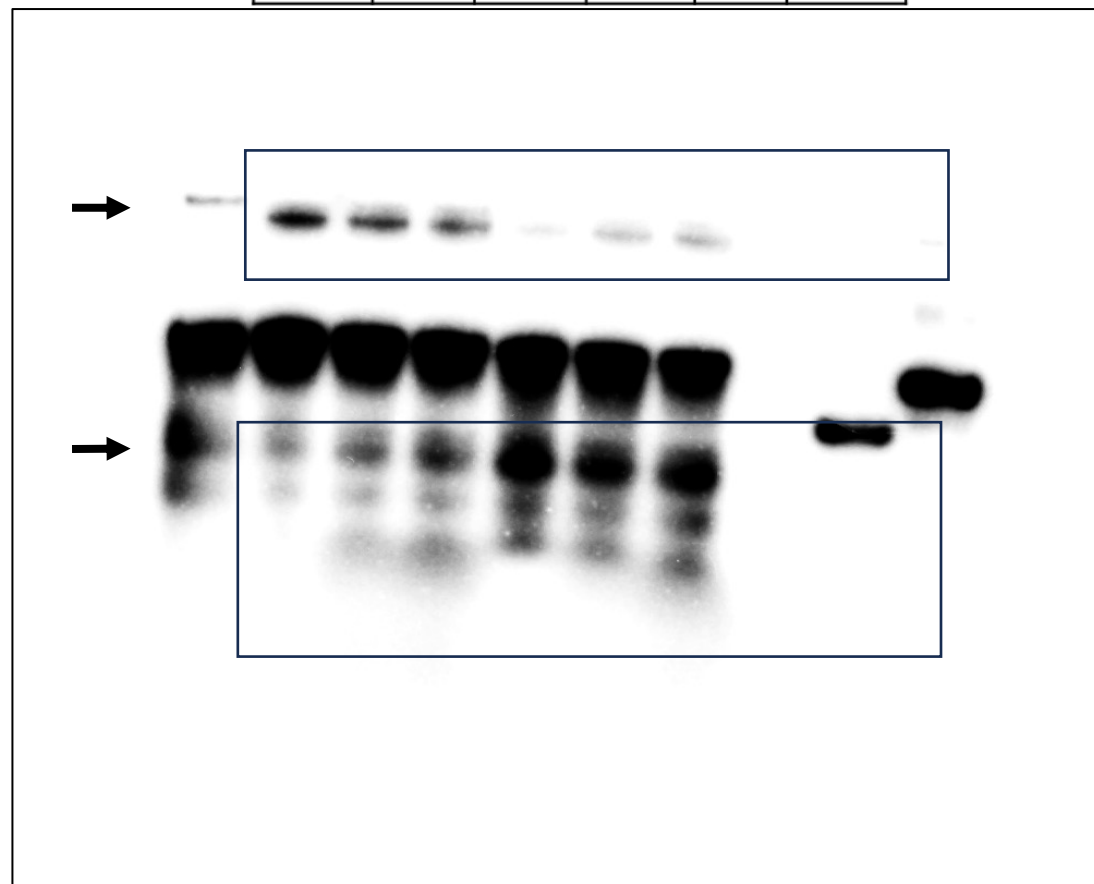



Full unedited blot for Supplemental Figure 6C

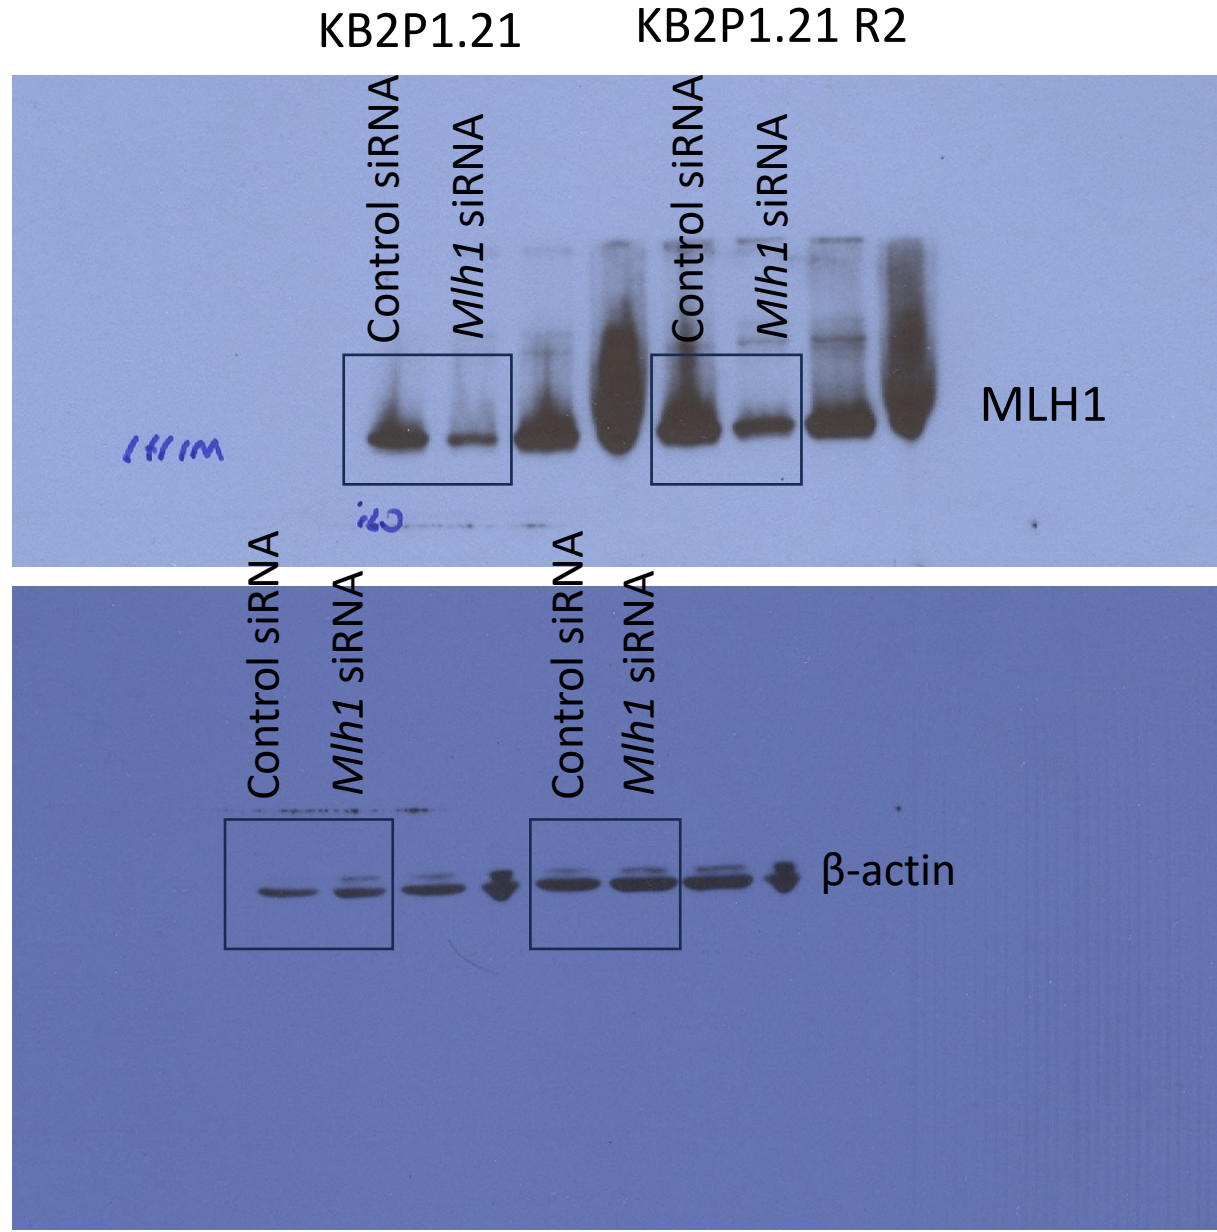

Full unedited blot for Supplemental Figure 6E

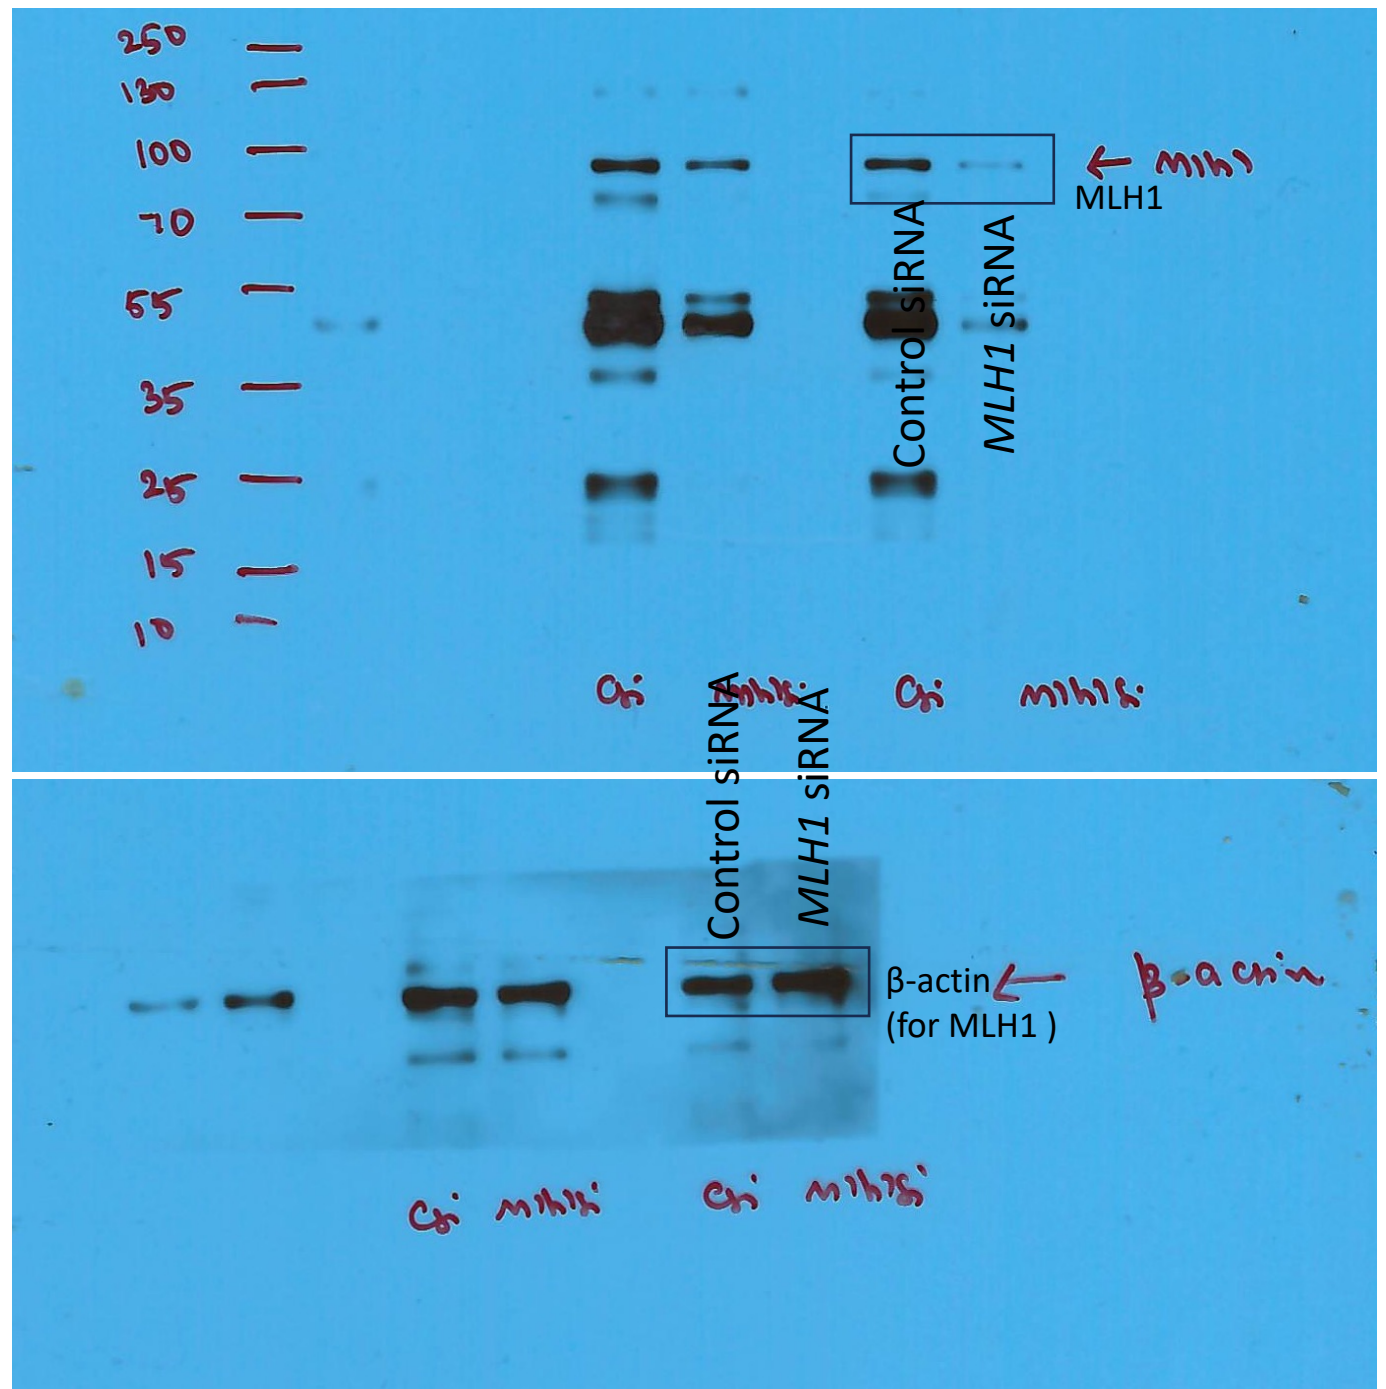

Full unedited blot for  
Supplemental Figure 6E

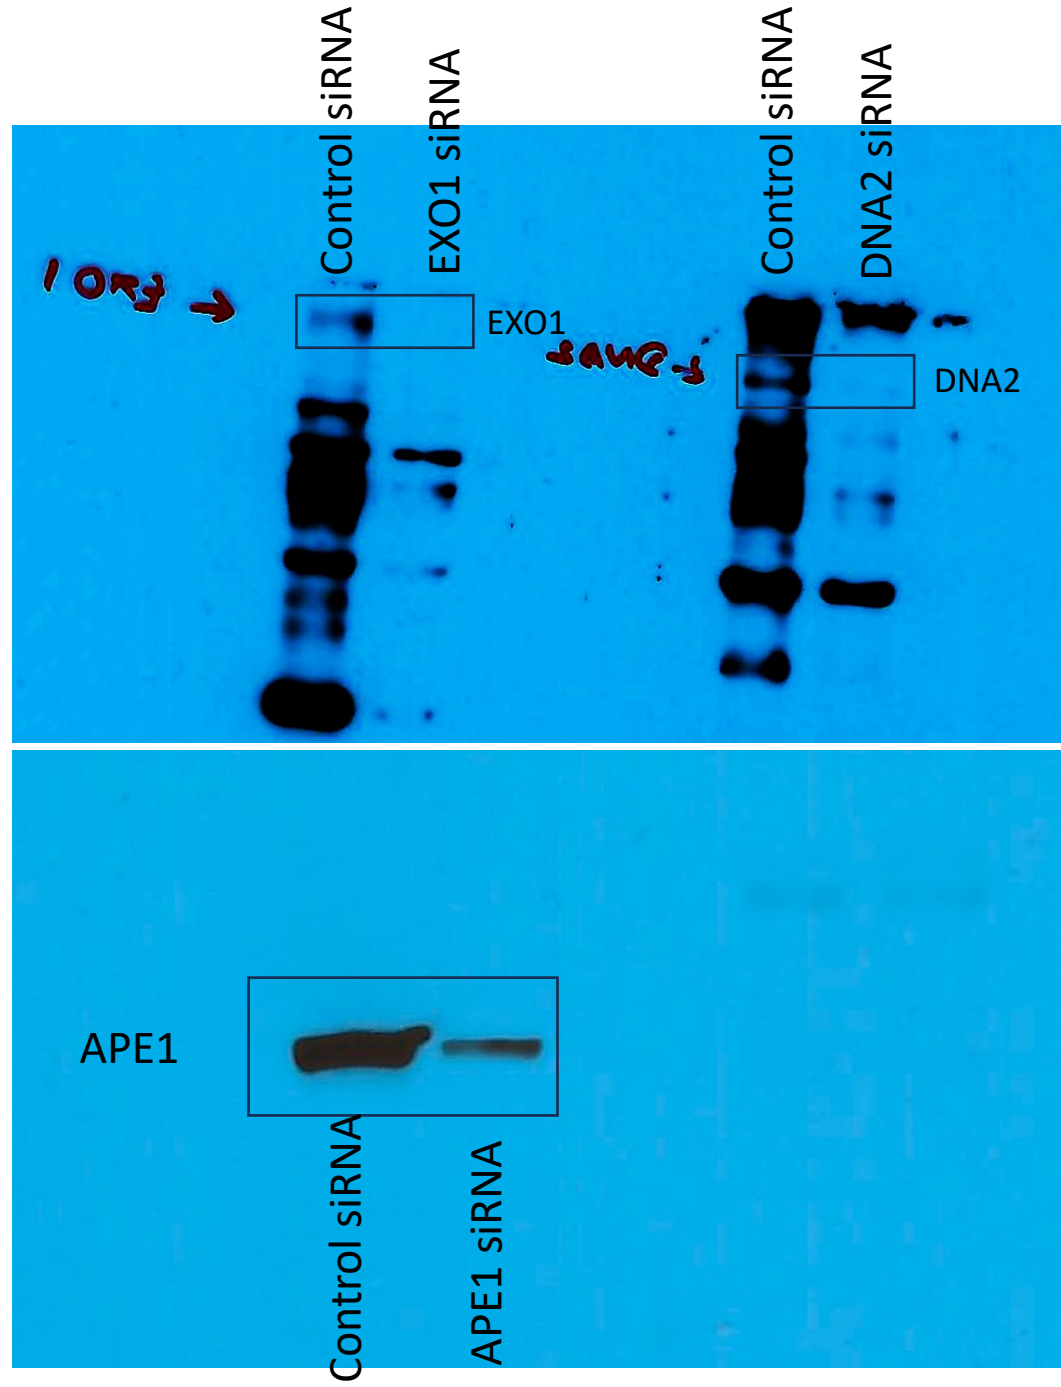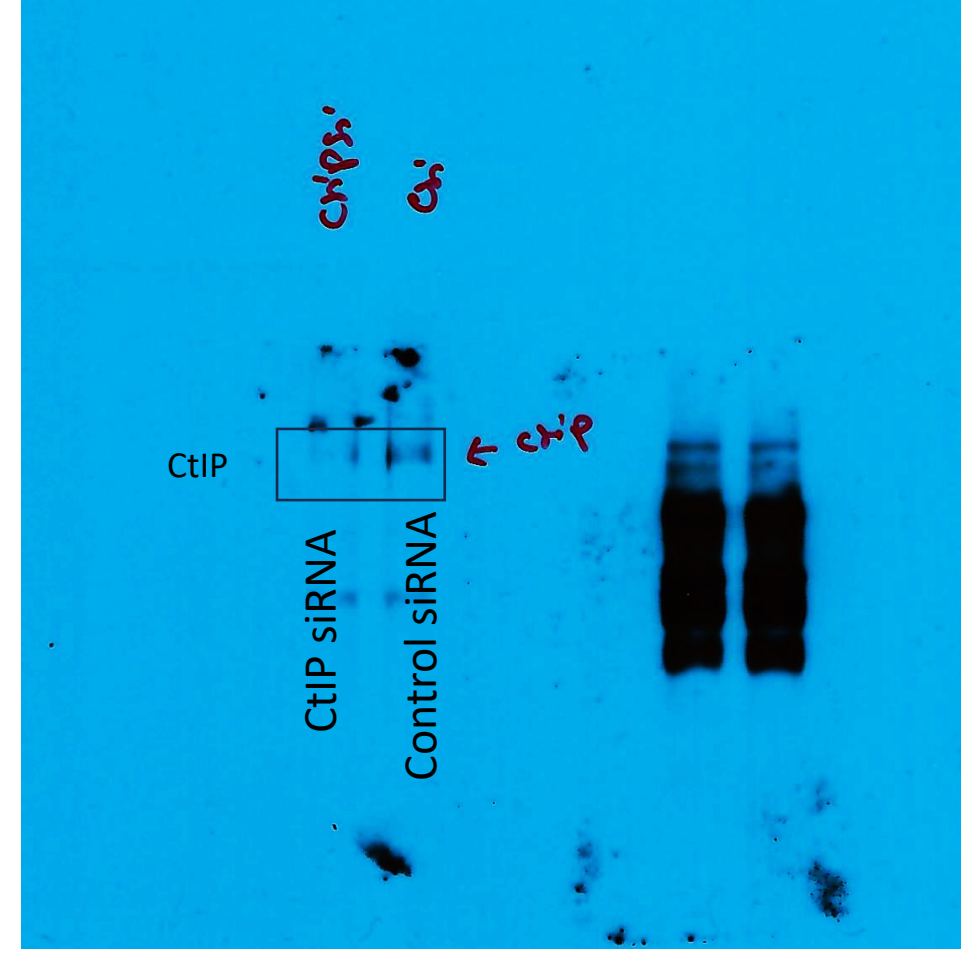



Full unedited blot for Supplemental Figure 6E

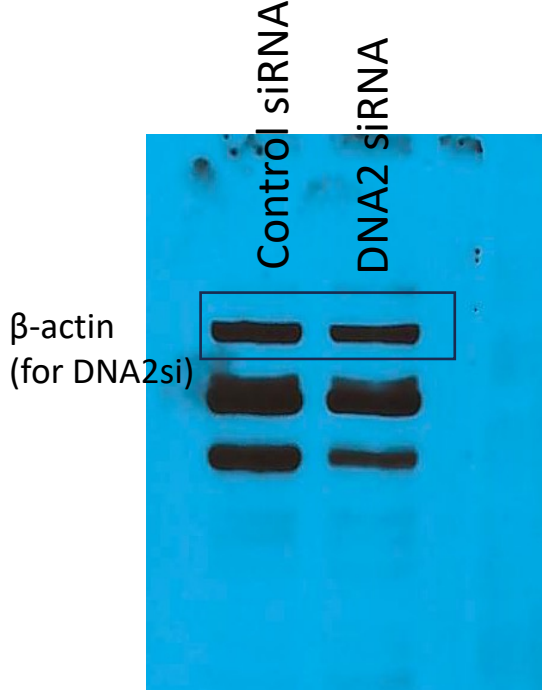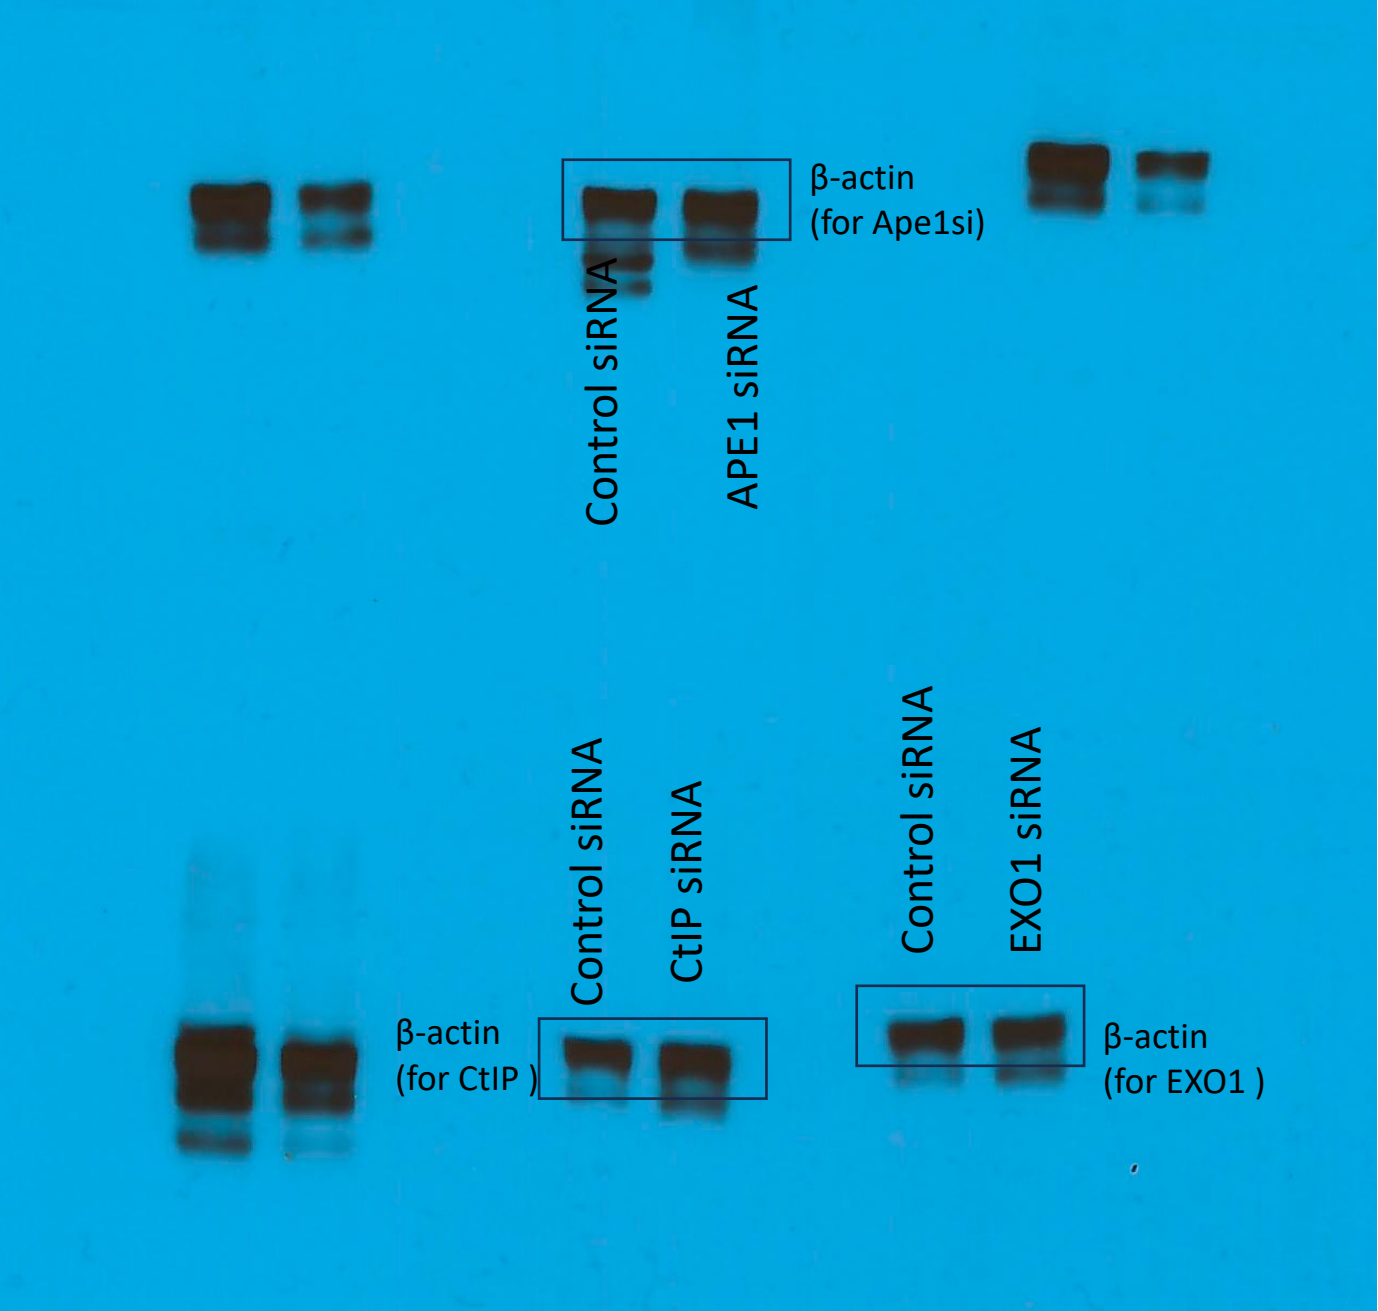

Full unedited blot for Supplemental Figure 8A

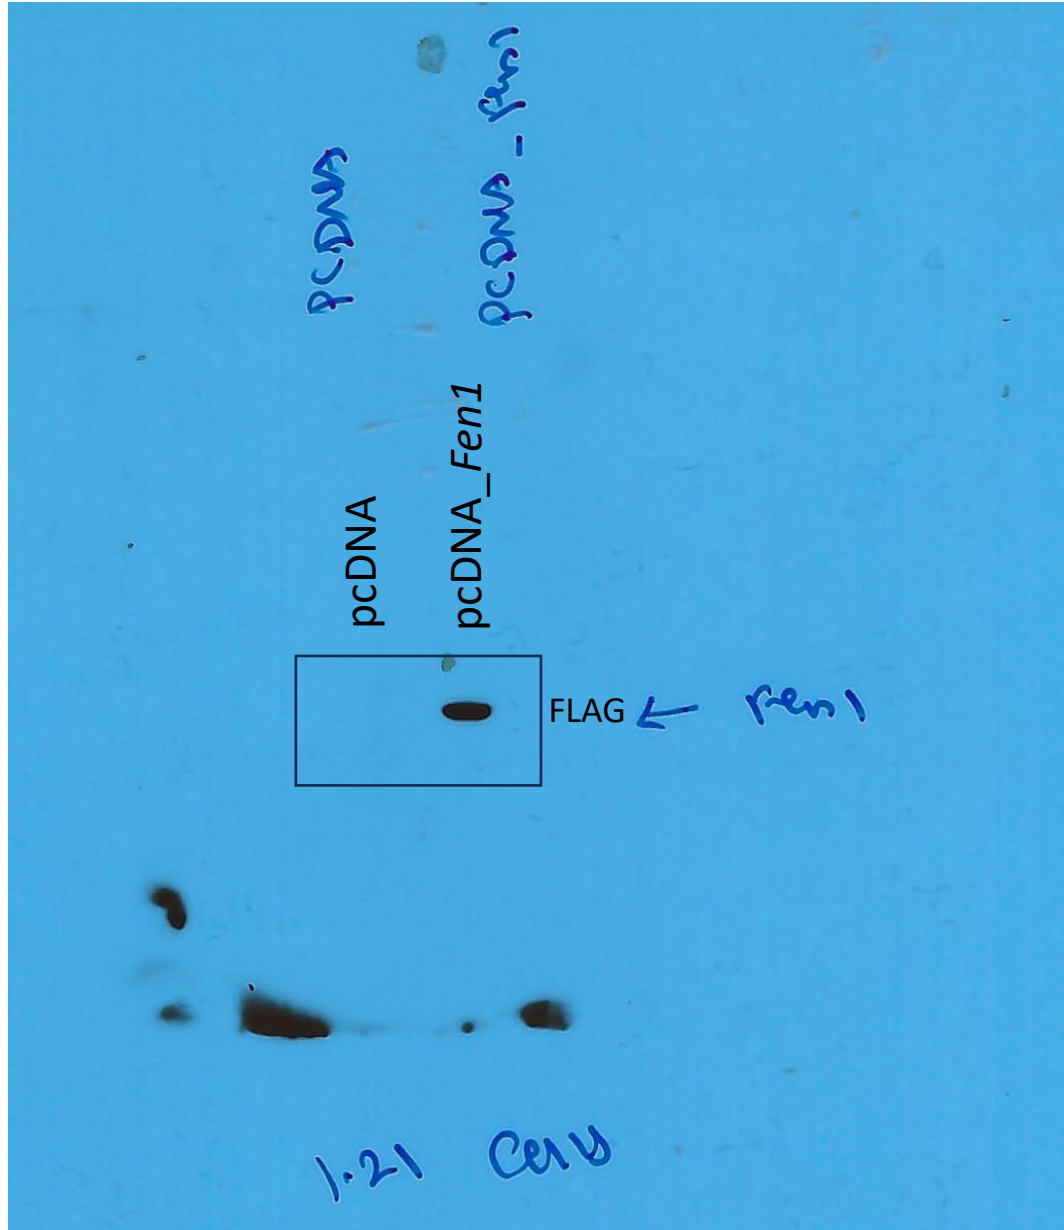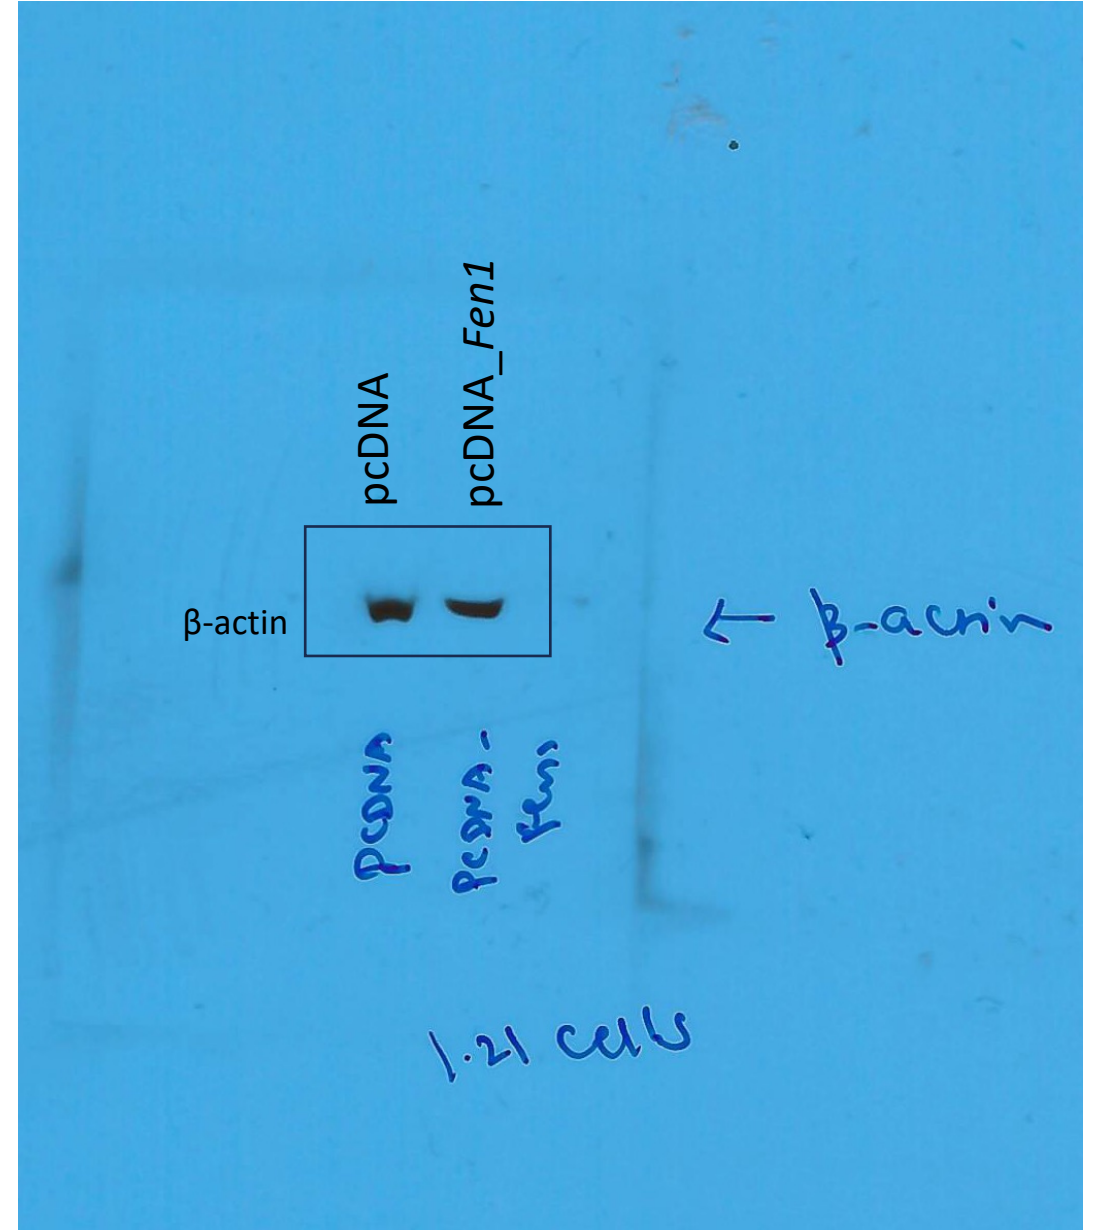



Full unedited blot for Supplemental Figure 8C

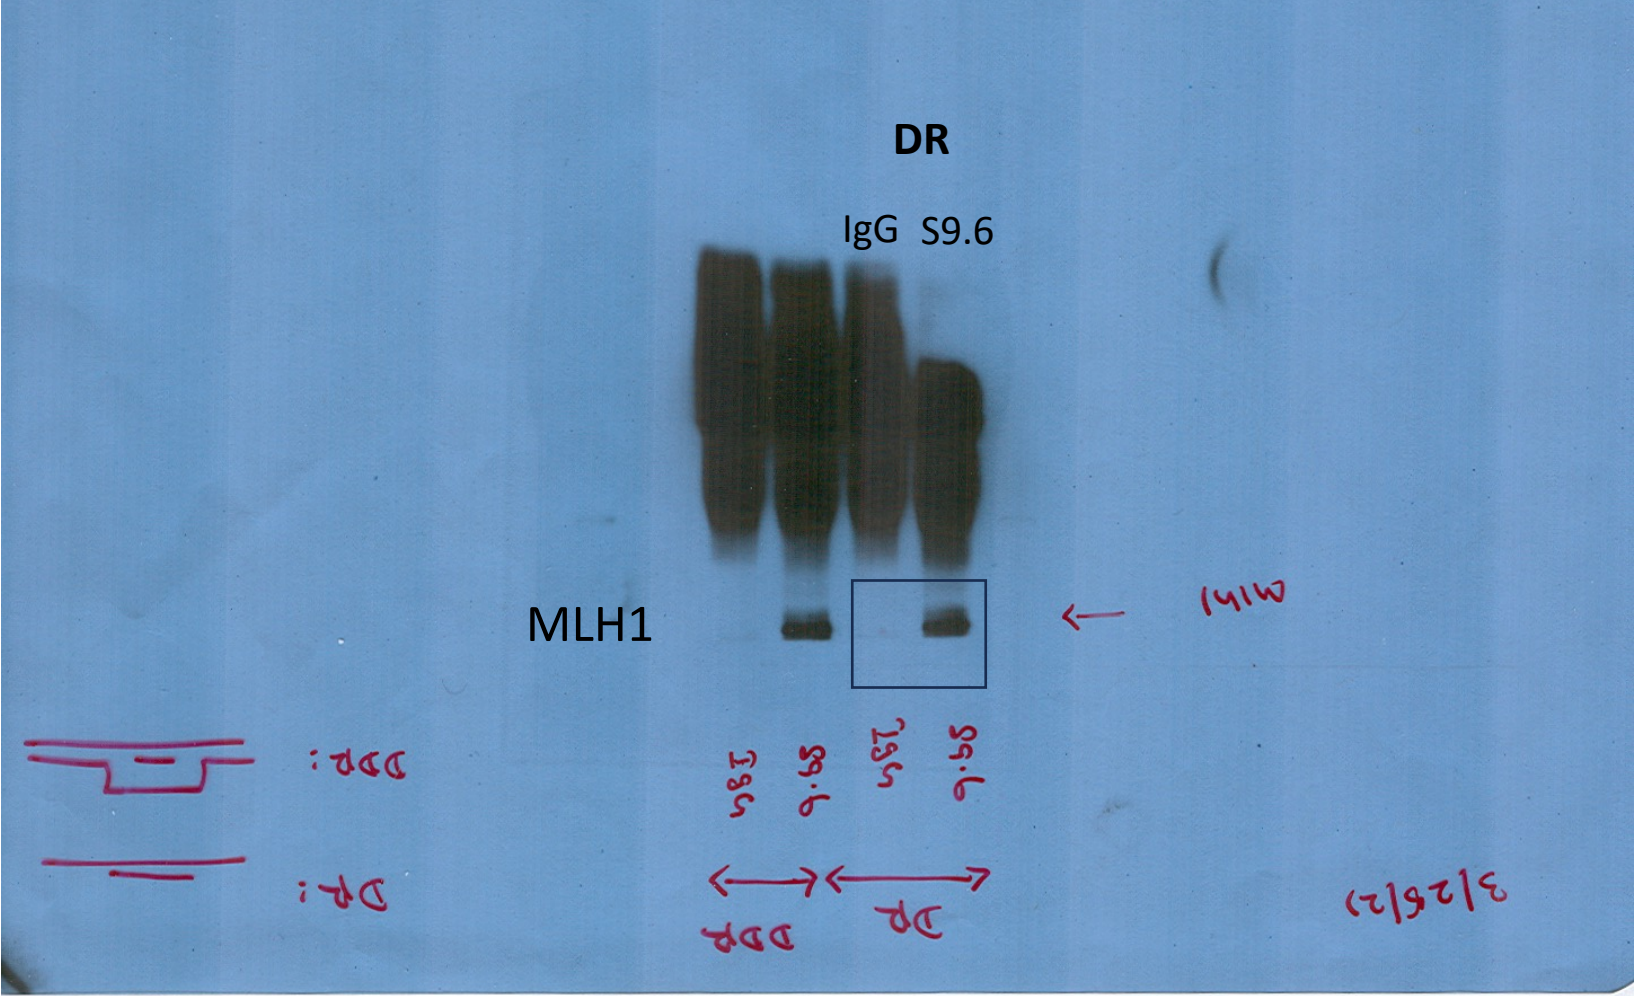

Full unedited blot for Supplemental Figure 8D

MLH1

IP: FEN1 IgG

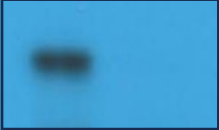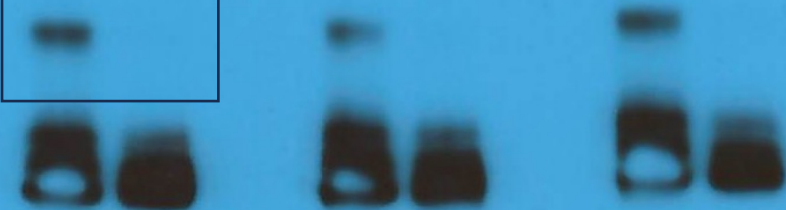

— 75  
— 100  
— 140

*MLH1*

FEN1

IP: FEN1 IgG

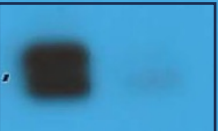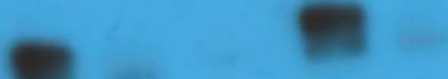

— 32  
— 40  
— 60

*FEN1*

Full unedited blot for Supplemental Figure 8D

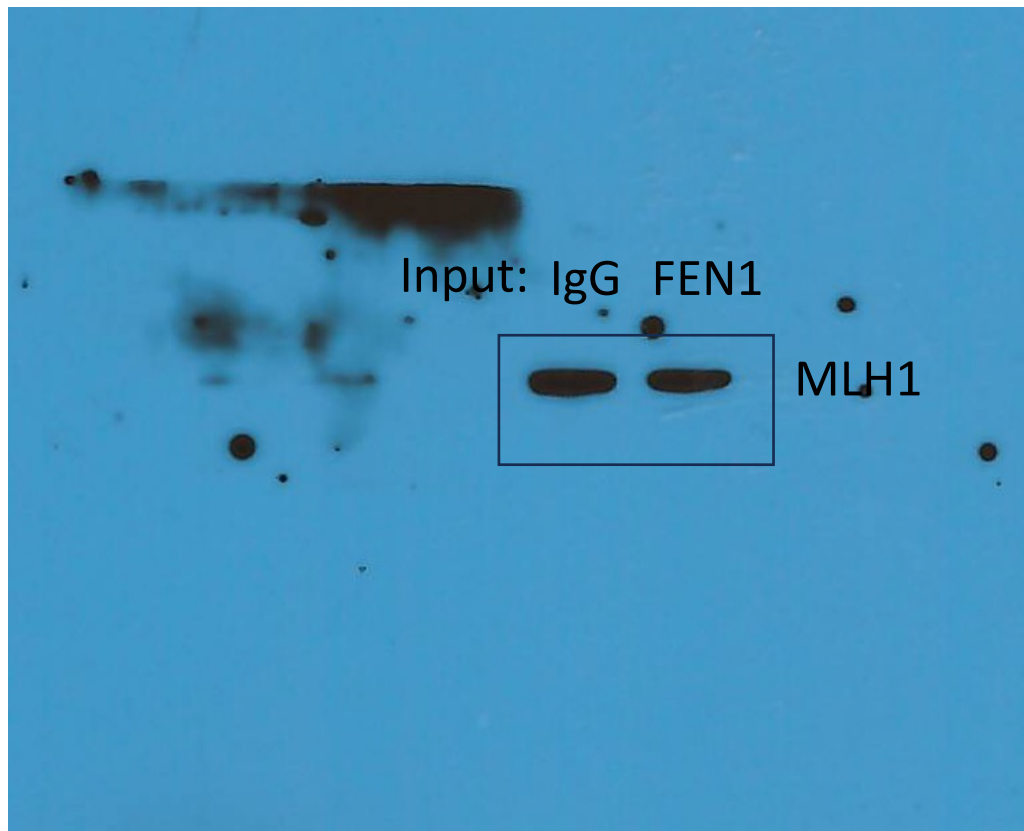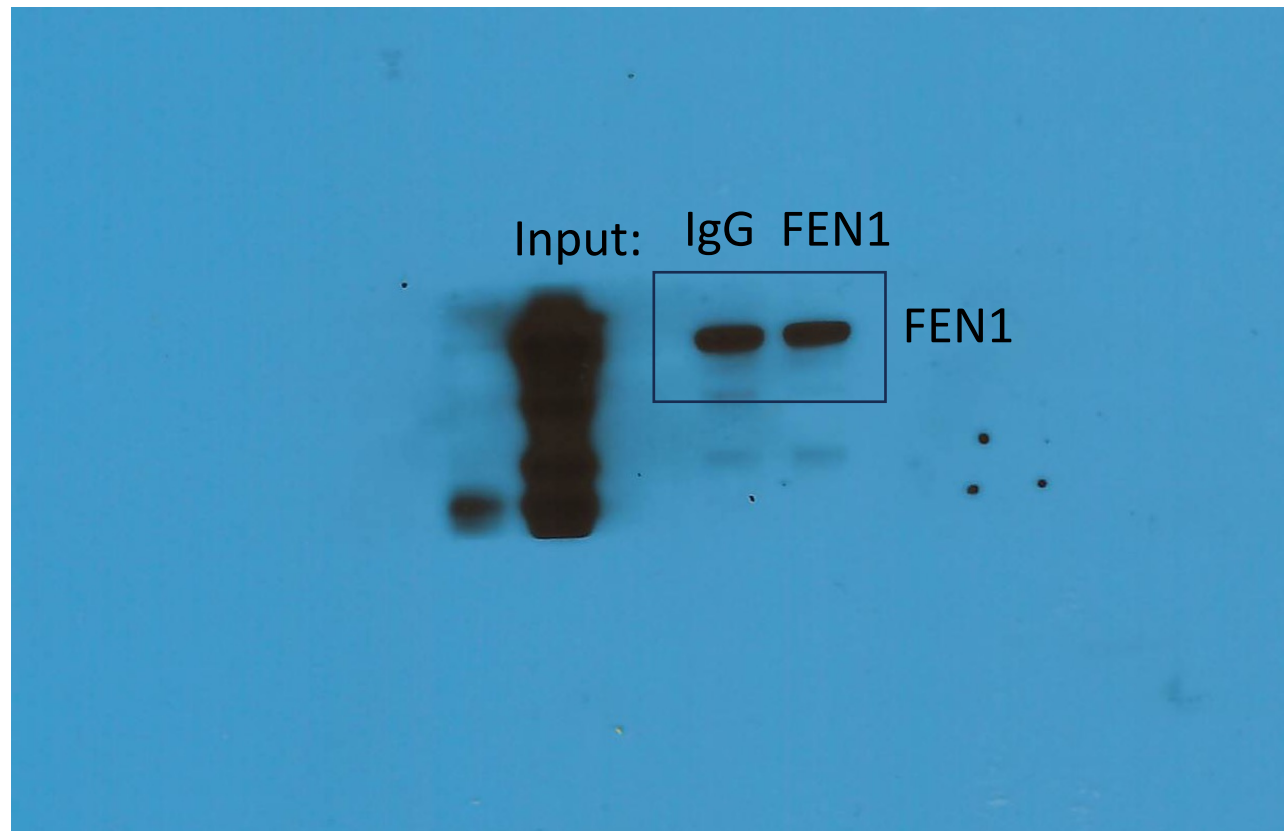

# Full unedited gel for Supplemental Figure 8E

|                    |   |   |   |   |   |   |   |
|--------------------|---|---|---|---|---|---|---|
| DNA flap substrate | - | + | + | + | + | + | + |
| MLH1 proetin       | - | - | + | + | - | + | + |
| FEN1 protein       | - | - | - | - | + | + | + |

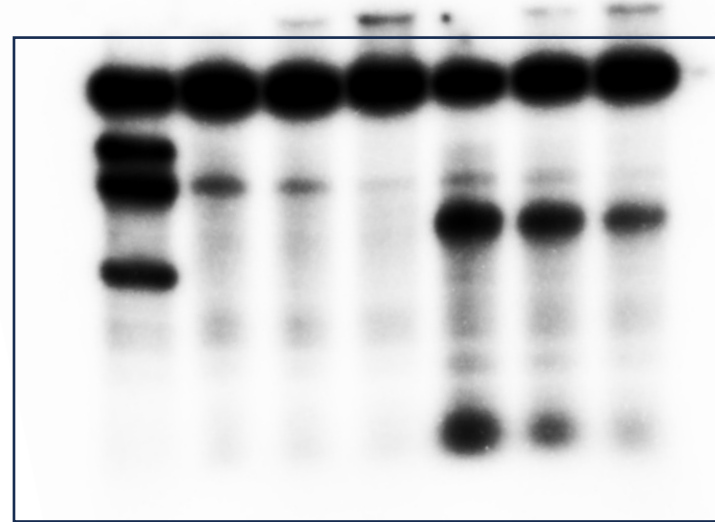

Full unedited gel for Supplemental Figure 8F

|   |   |   |   |                    |
|---|---|---|---|--------------------|
| - | + | + | + | DNA flap substrate |
| - | - | + | + | MLH1 protein       |
| - | - | - | + | FEN1 protein       |

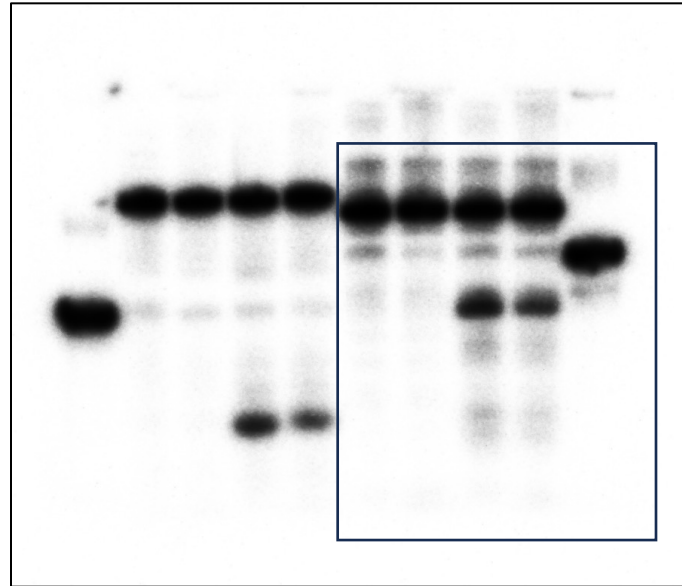



Full unedited blot for Supplemental Figure 8G

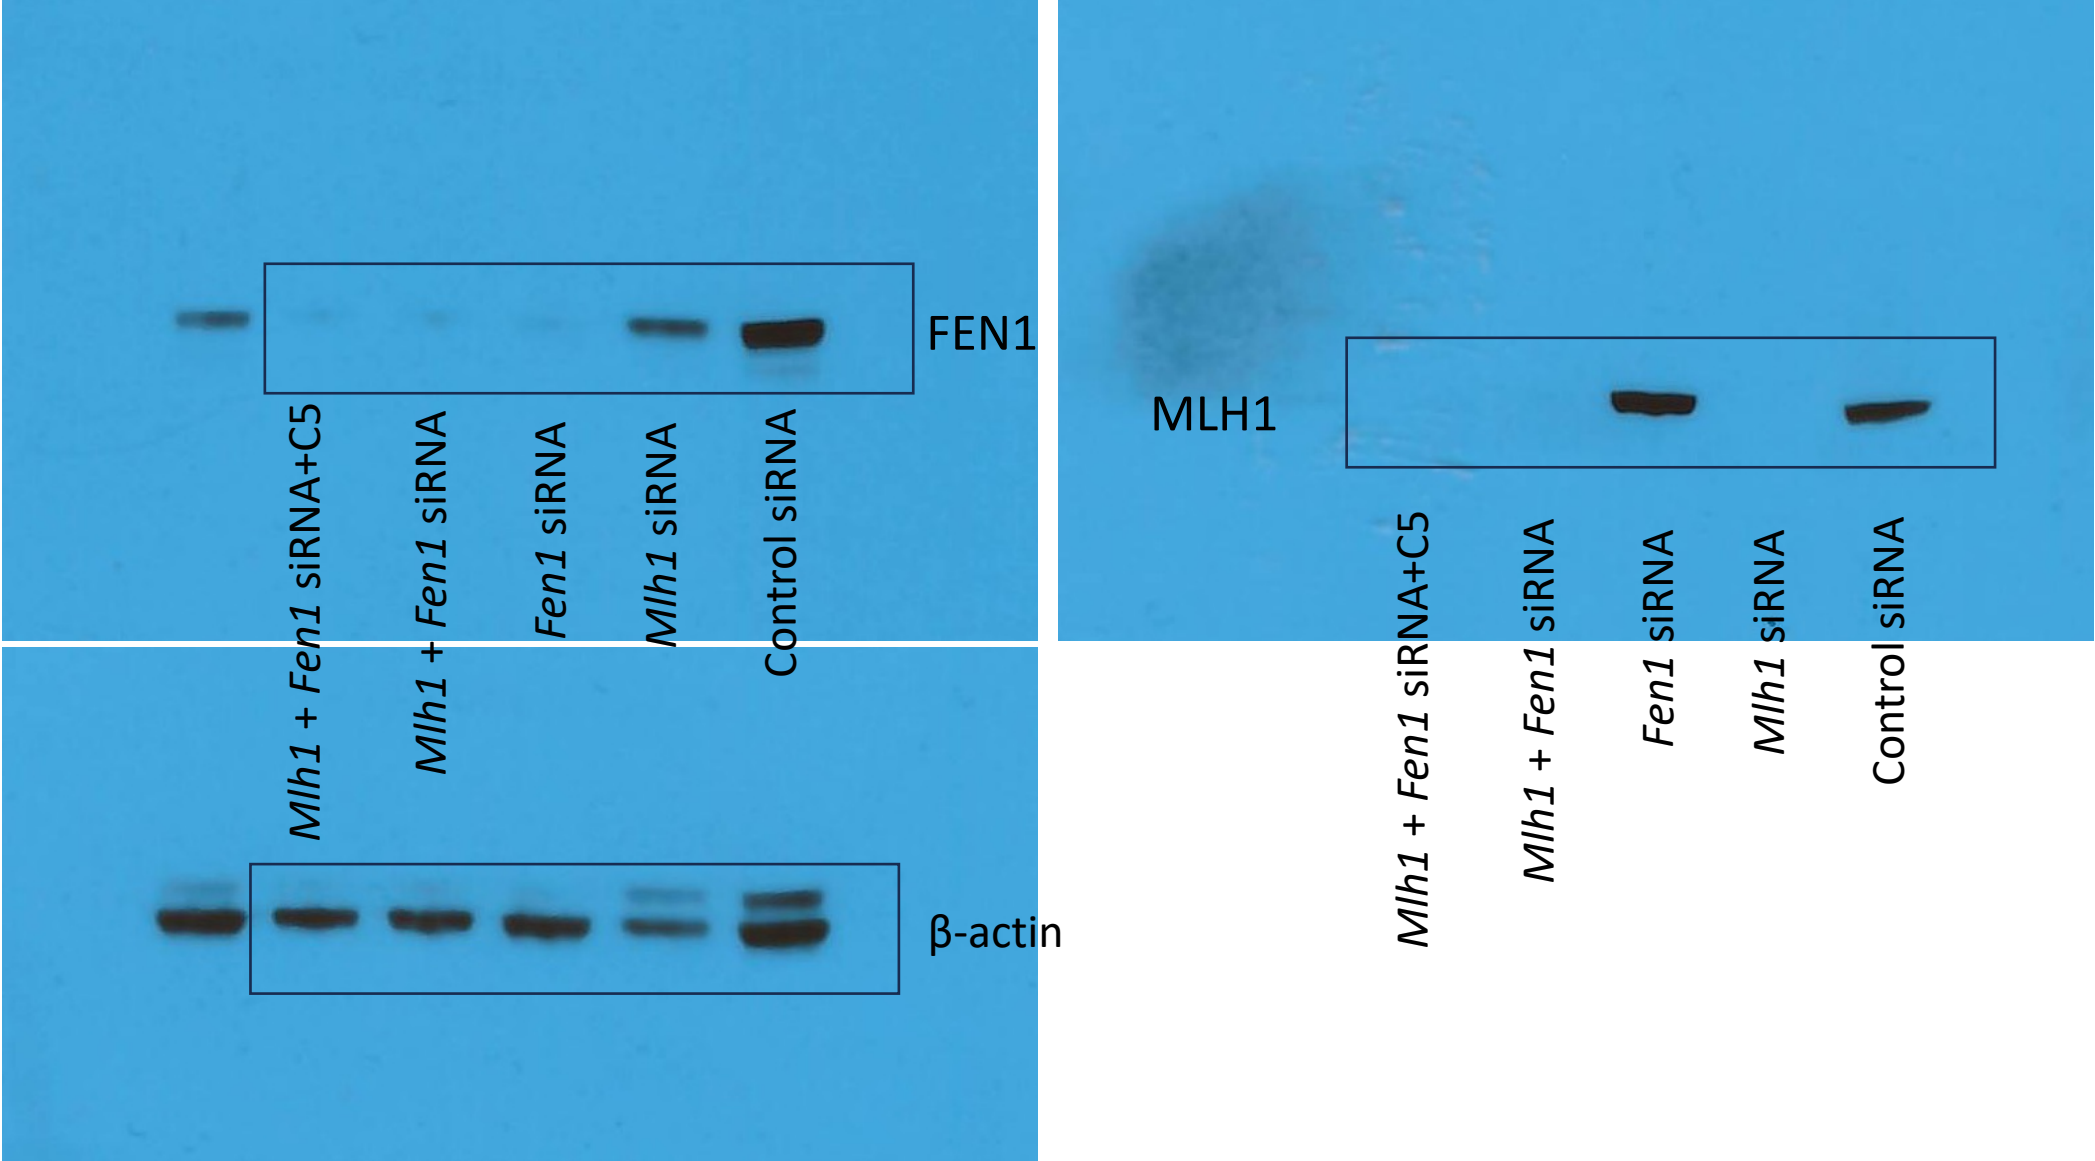

Full unedited blot for Supplemental Figure 8H

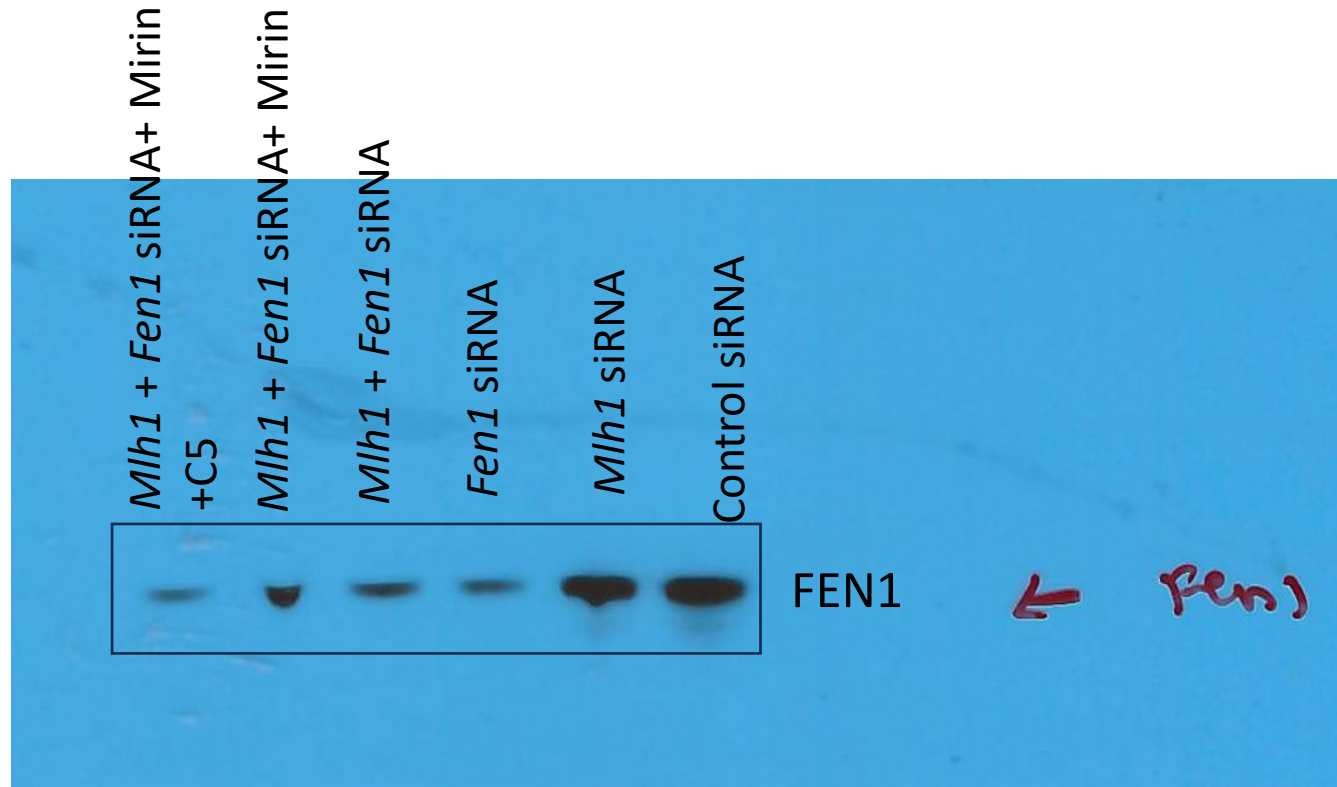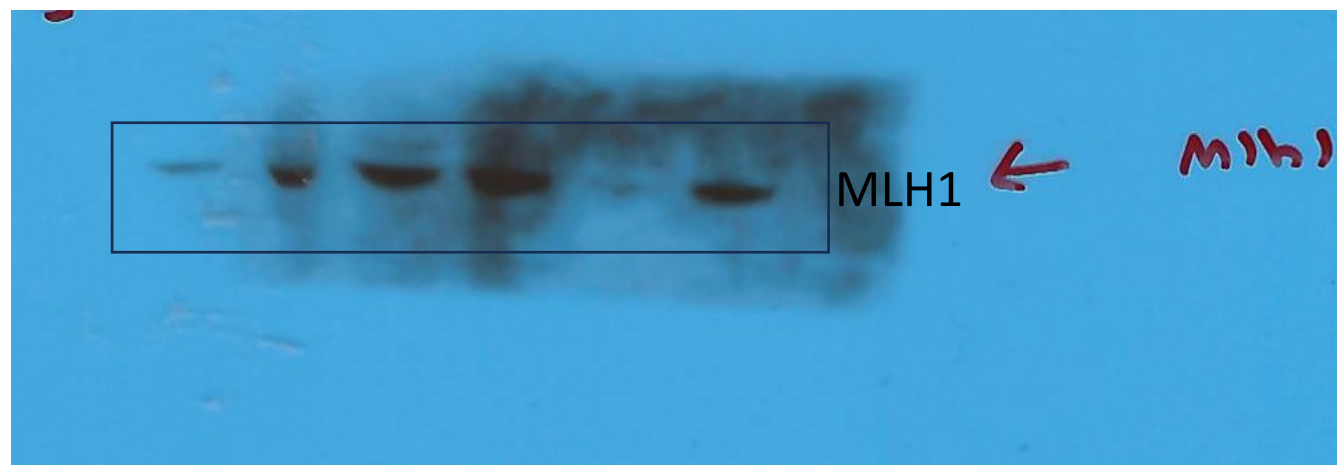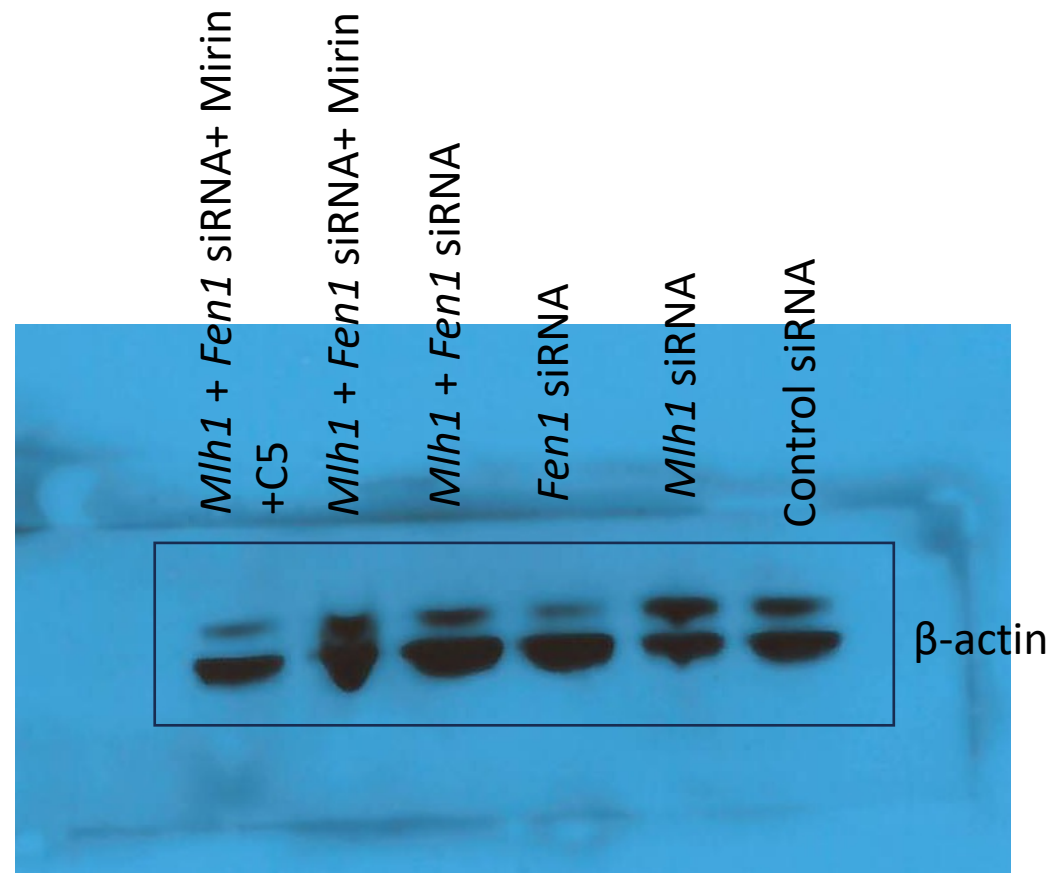

Full unedited blot for Figure 4D

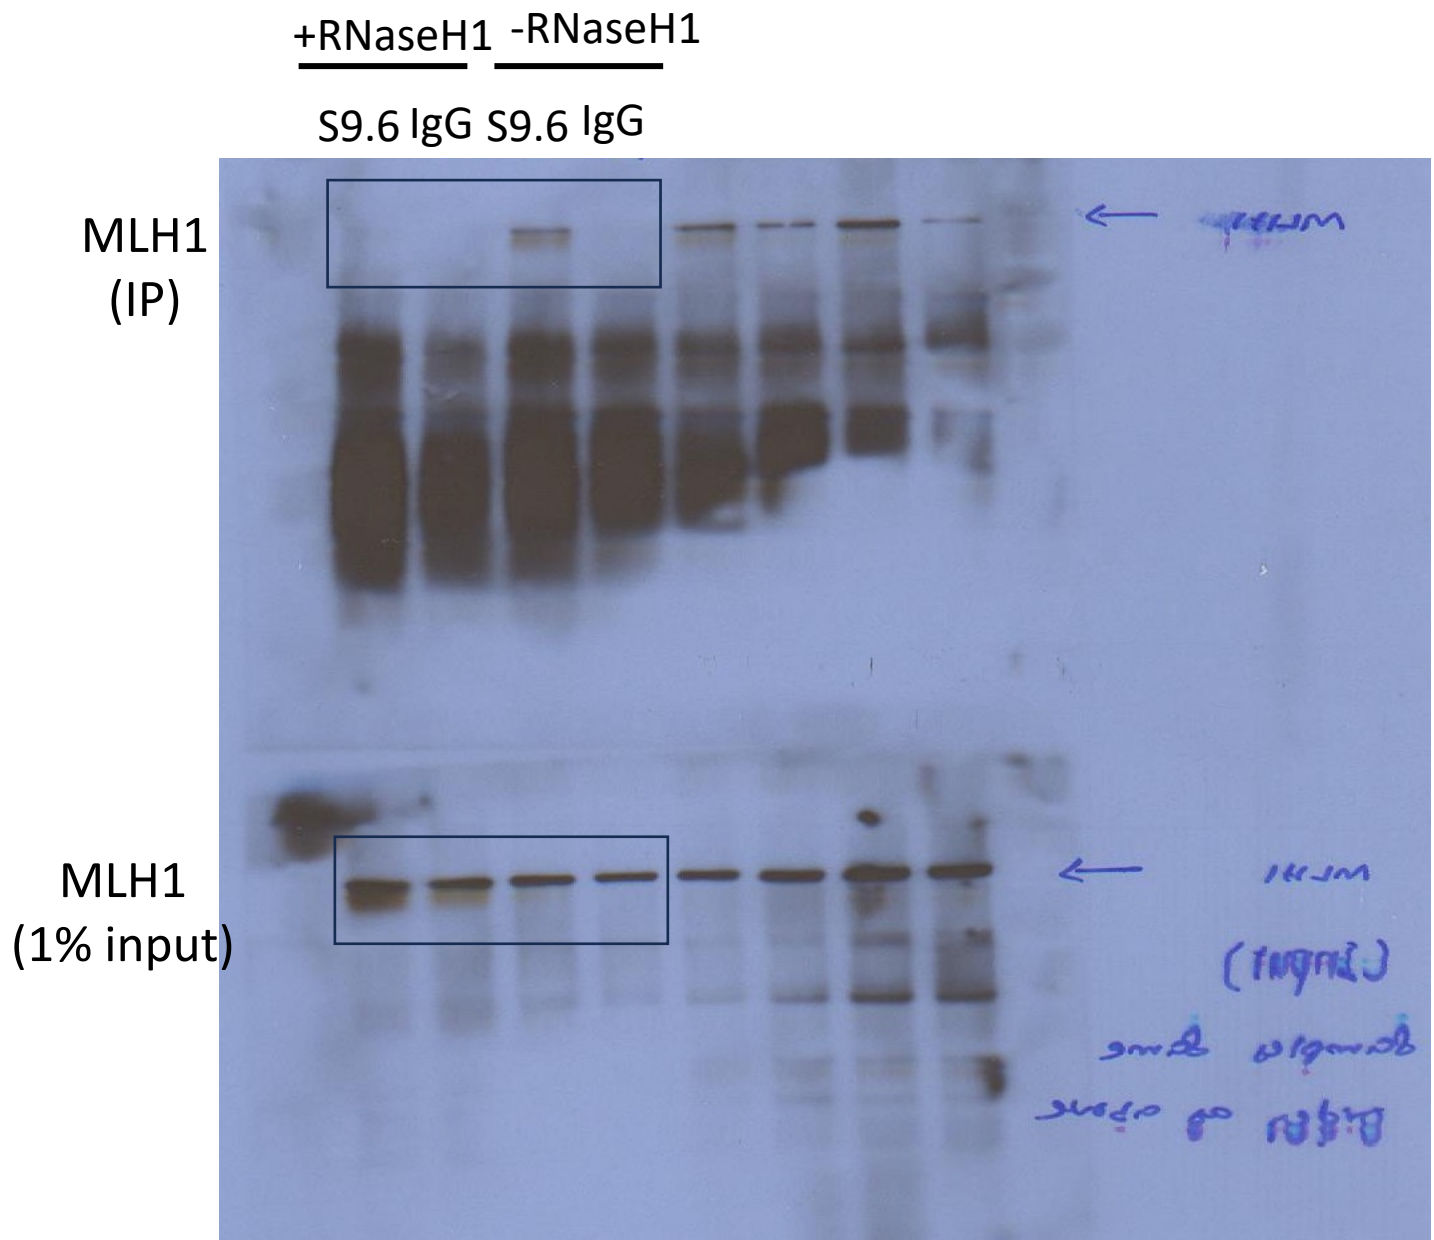



Full unedited blot for Figure 4E

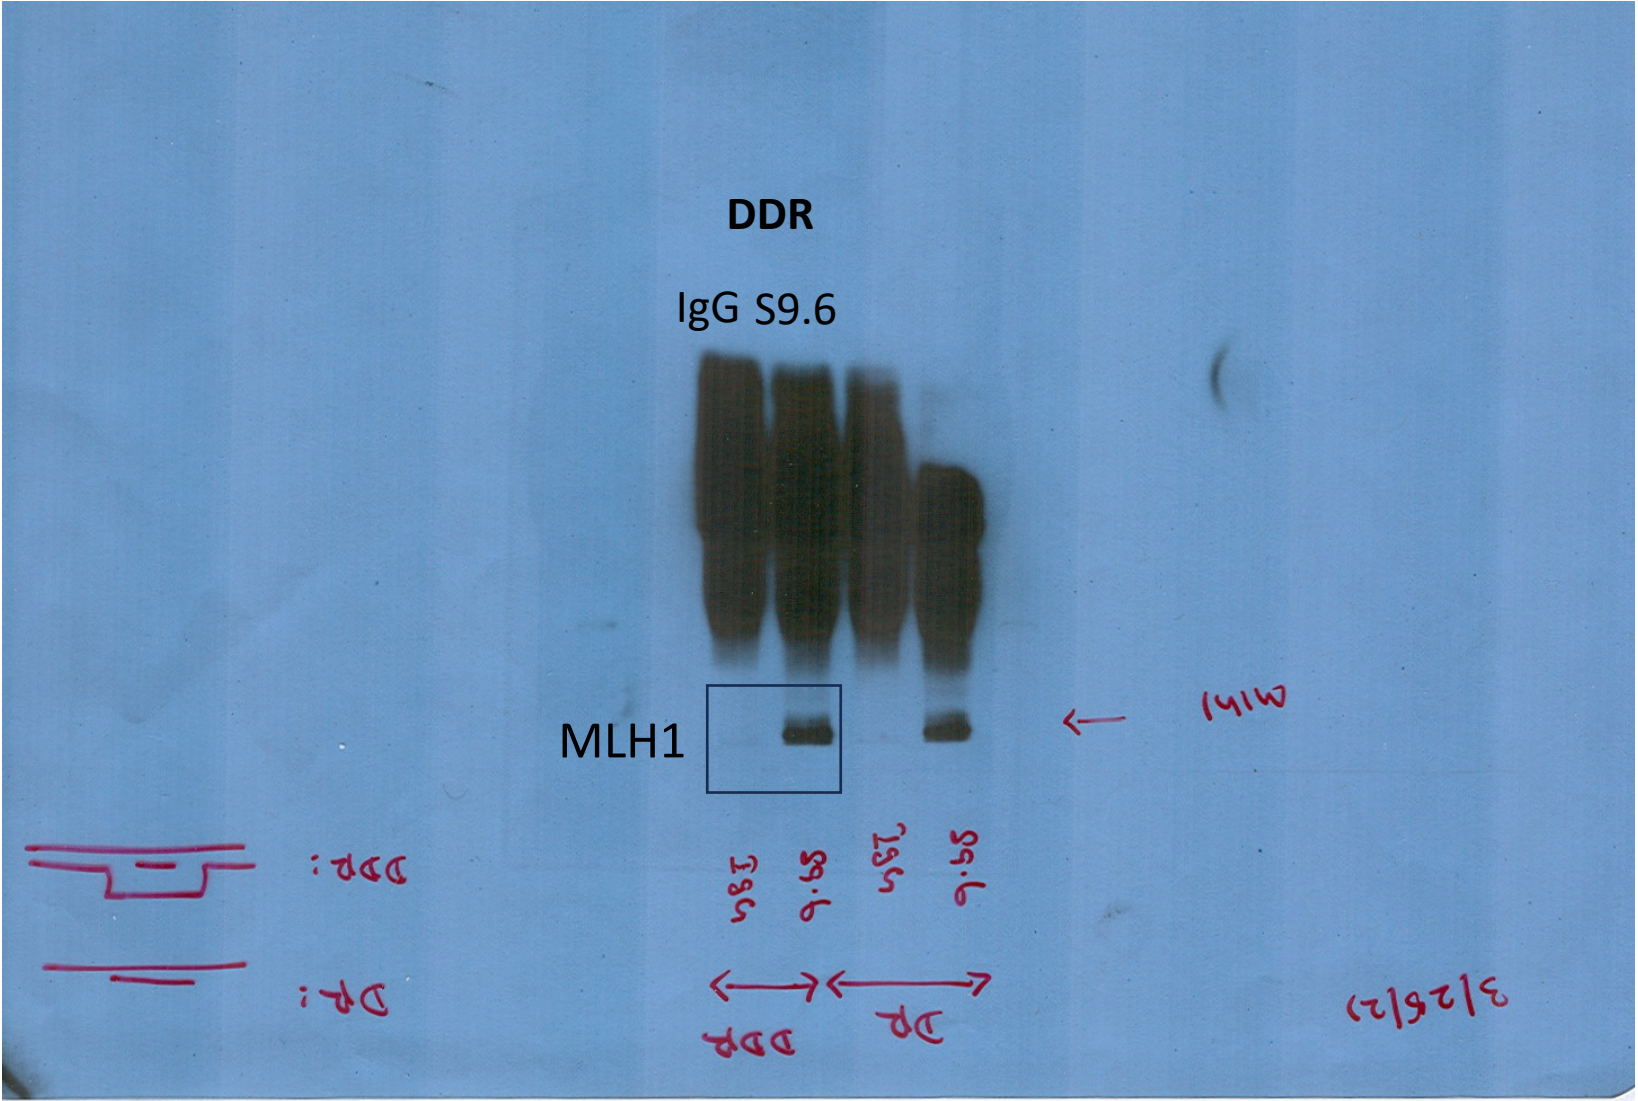



Full unedited gel for Figure 4F

25ng 50ng : FEN1

|           |   |   |   |   |   |   |   |   |   |      |           |
|-----------|---|---|---|---|---|---|---|---|---|------|-----------|
| RNA oligo | - | + | + | - | + | + | - | + | + | MLH1 |           |
|           | + | + | + | + | + | + | + | + | + |      | Substrate |
|           | - | - | - | + | + | + | + | + | + |      |           |
|           | - | - | - | + | + | + | + | + | + |      |           |

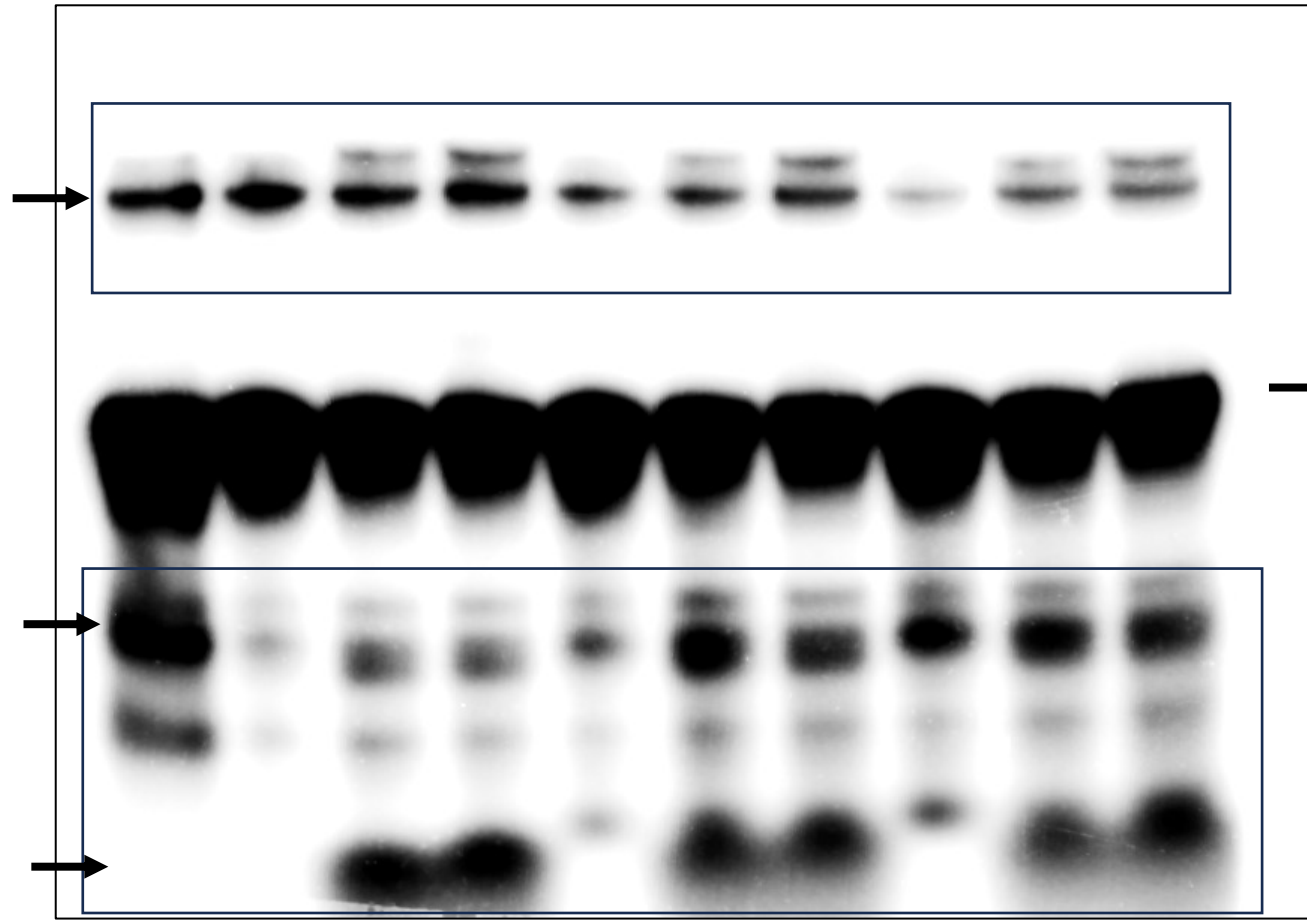

Long exposure

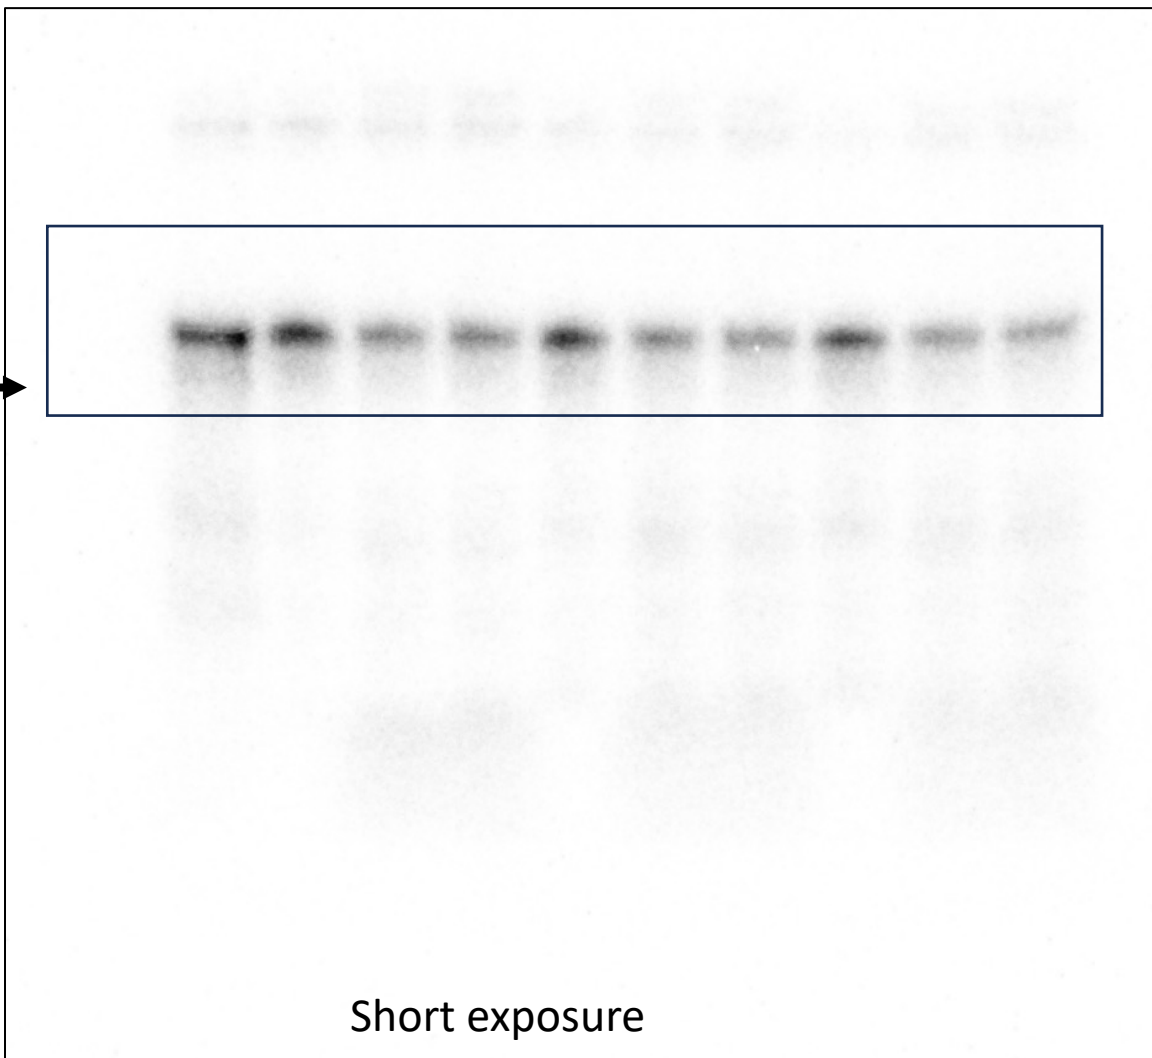

Short exposure

Full unedited blot for Figure 4H

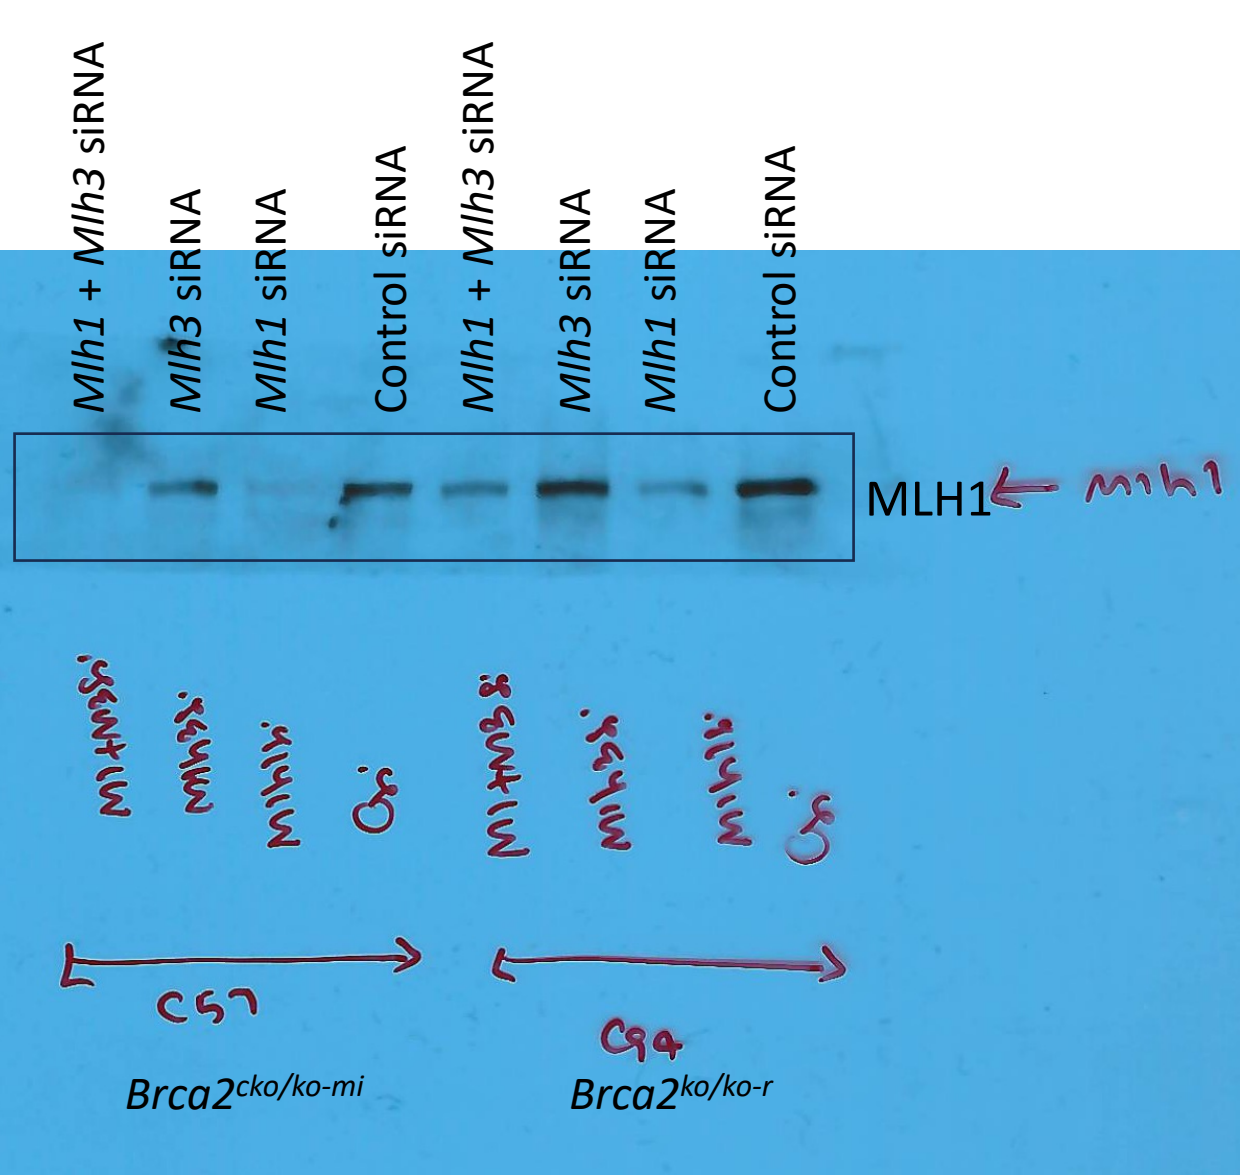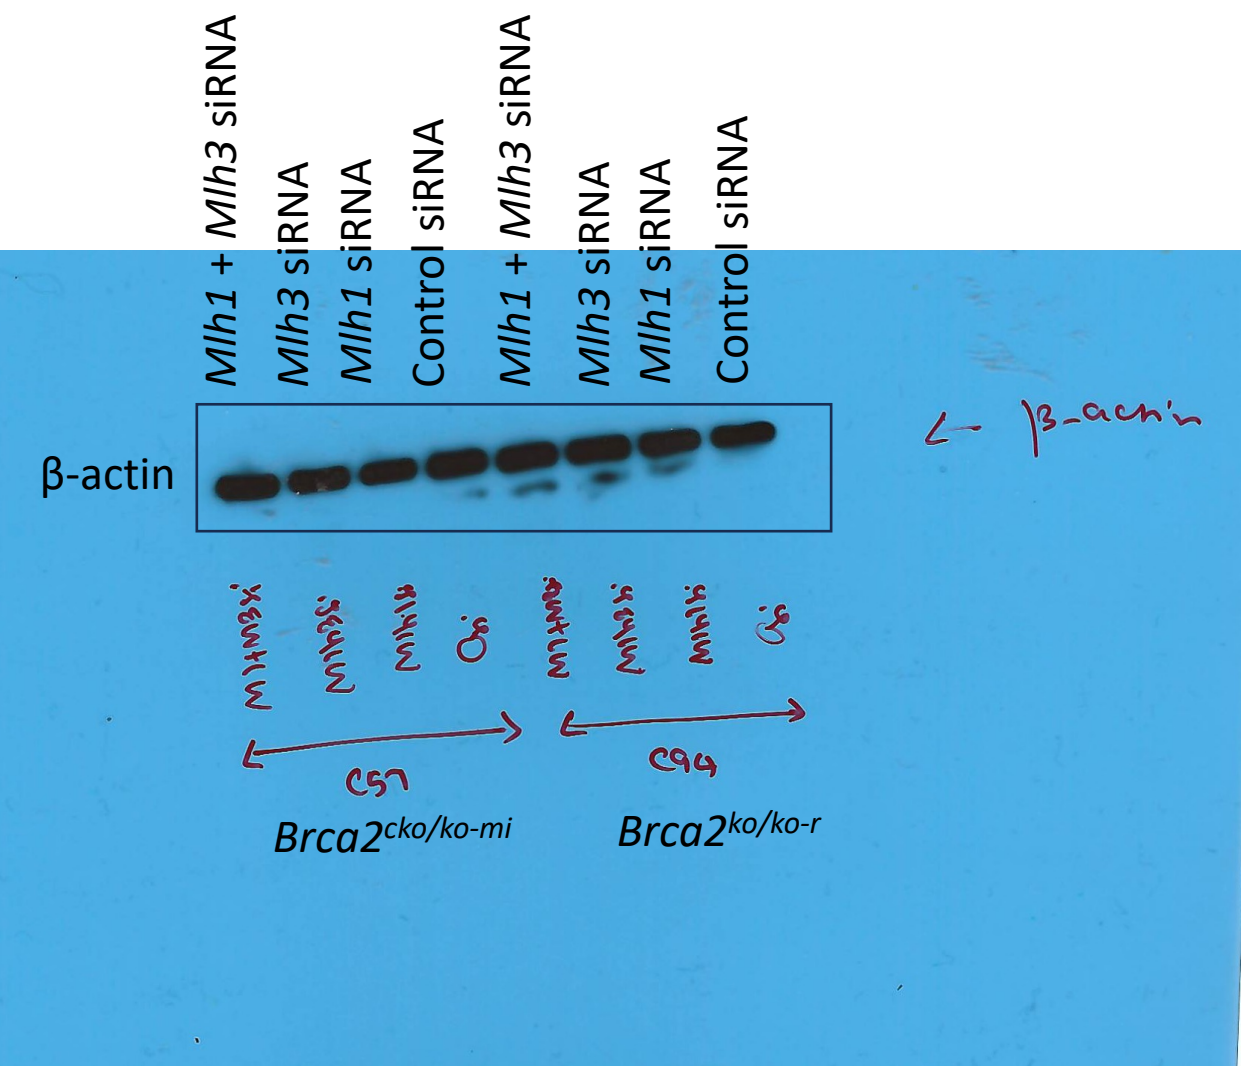

Full unedited blot for Figure 6B

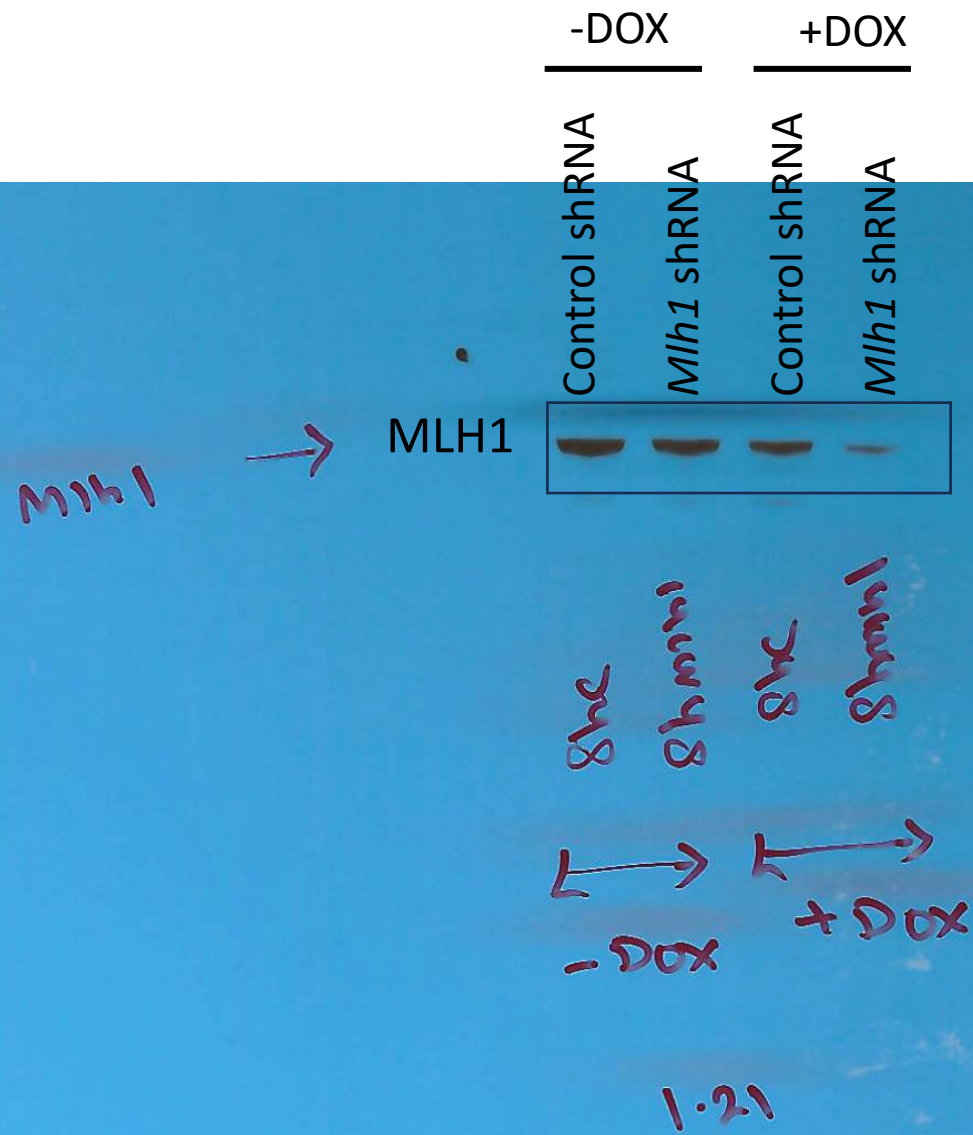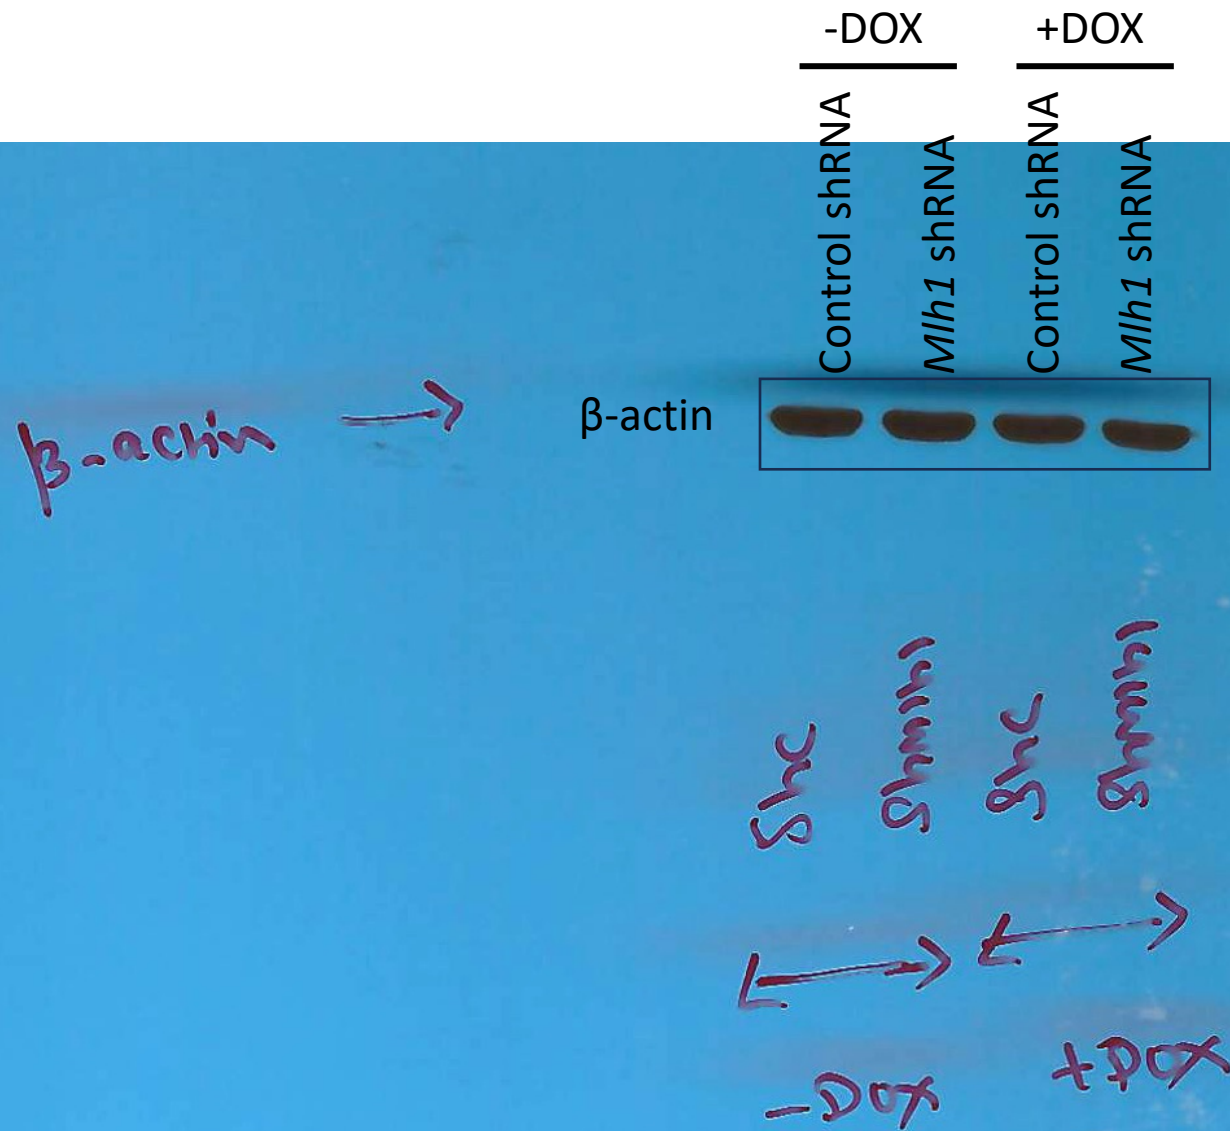



Full unedited blot  
for Figure 7B

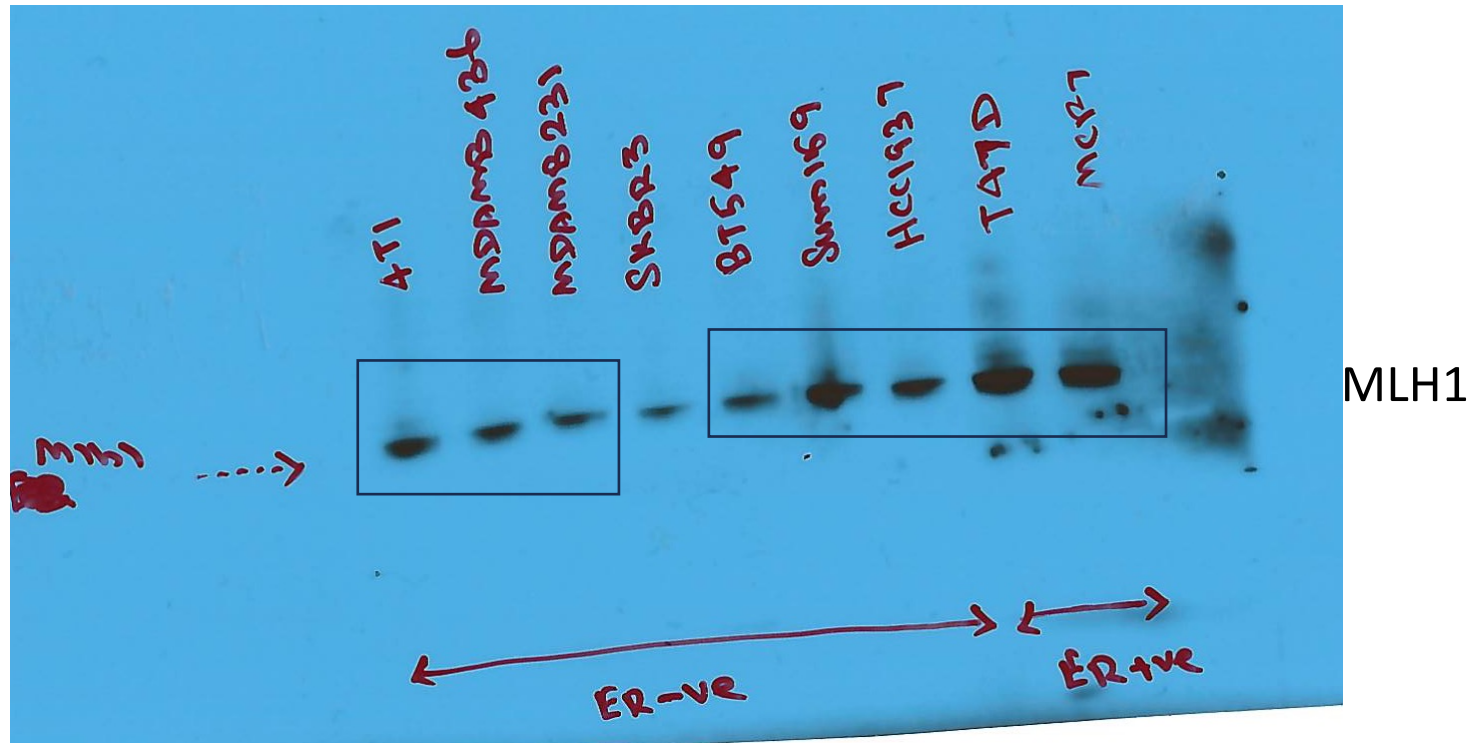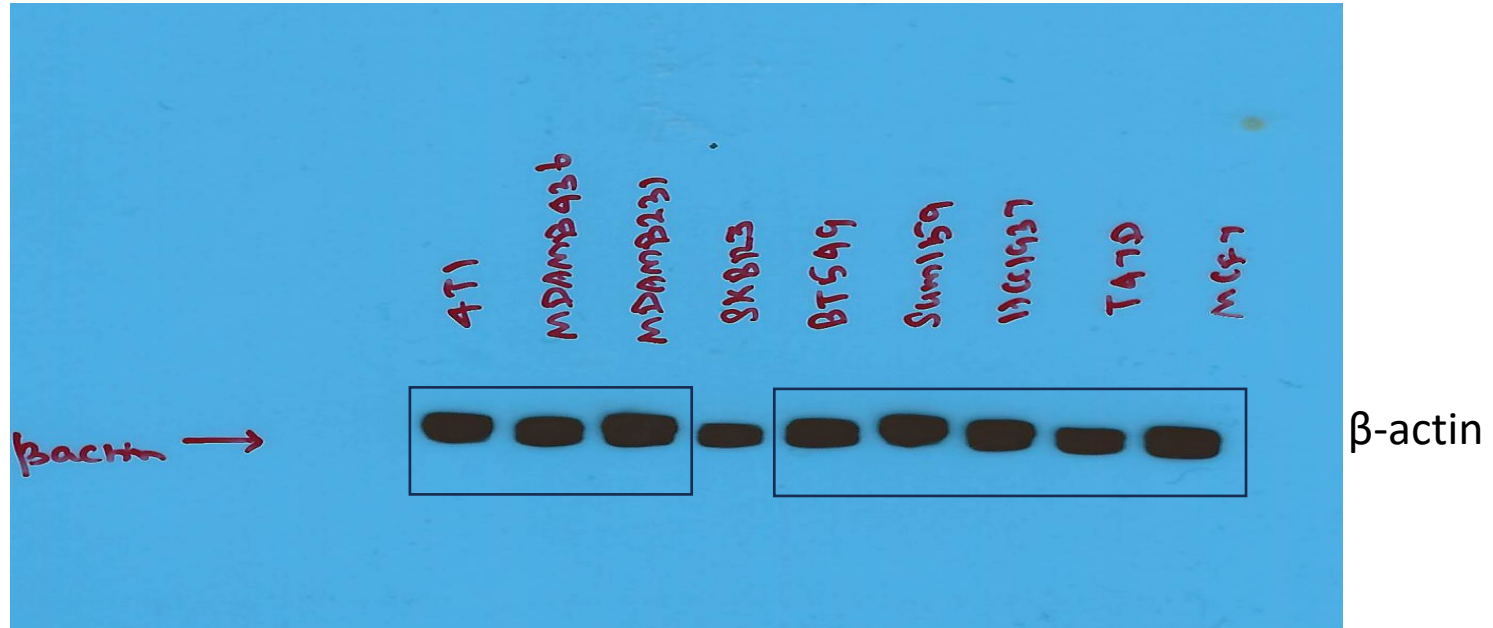



Full unedited blot for Figure 7C

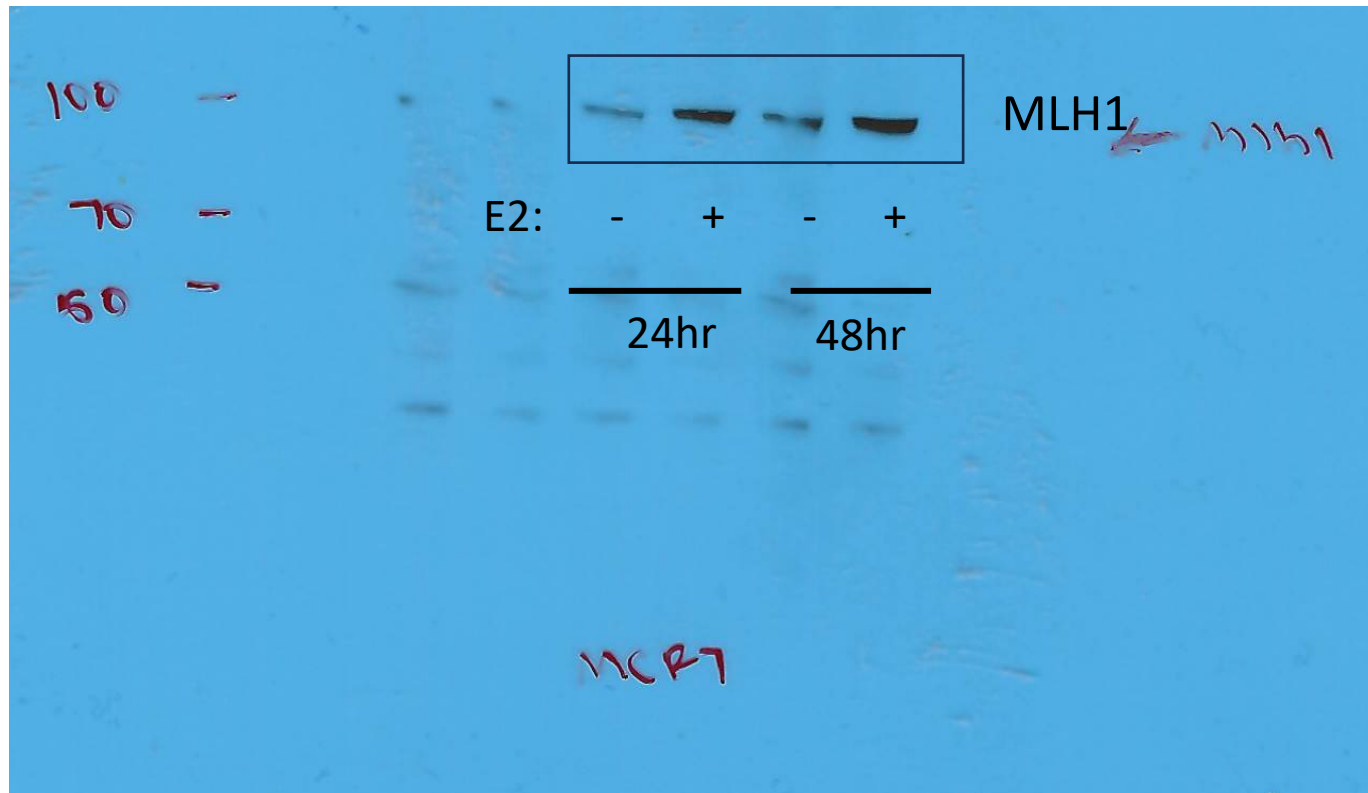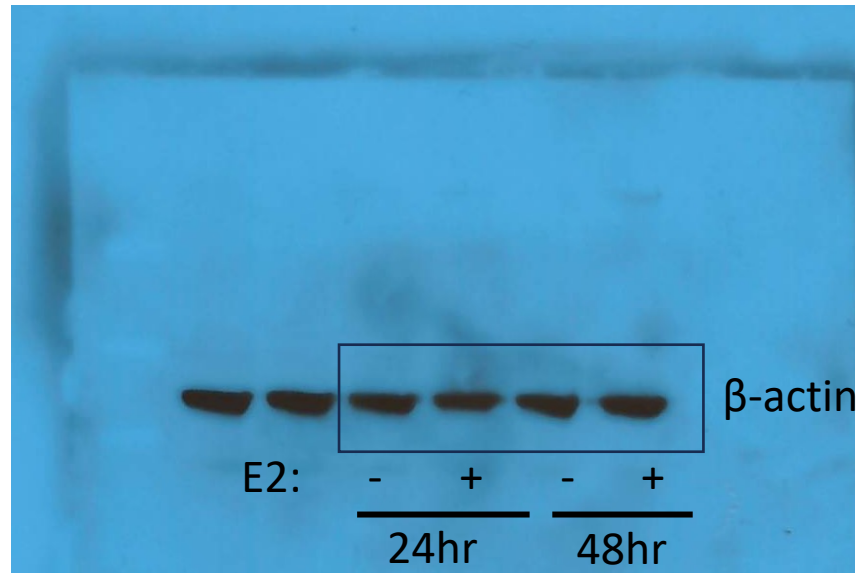

Full unedited blot for Figure 7D

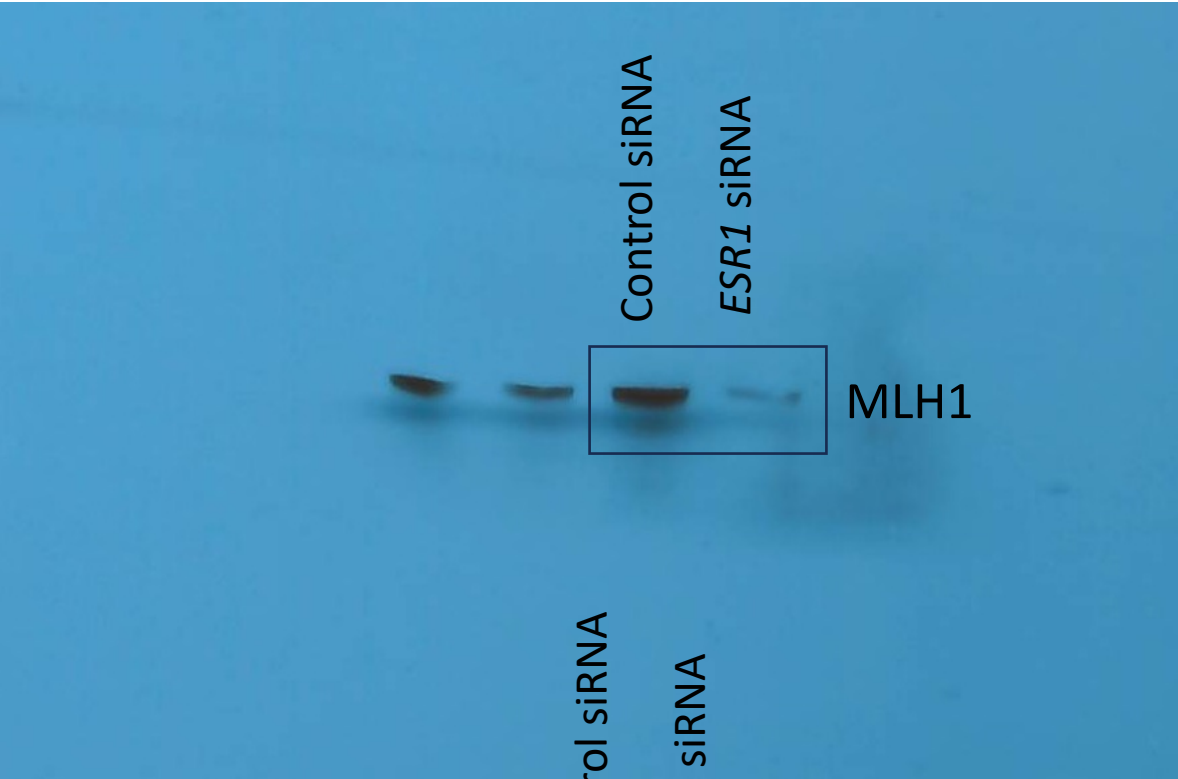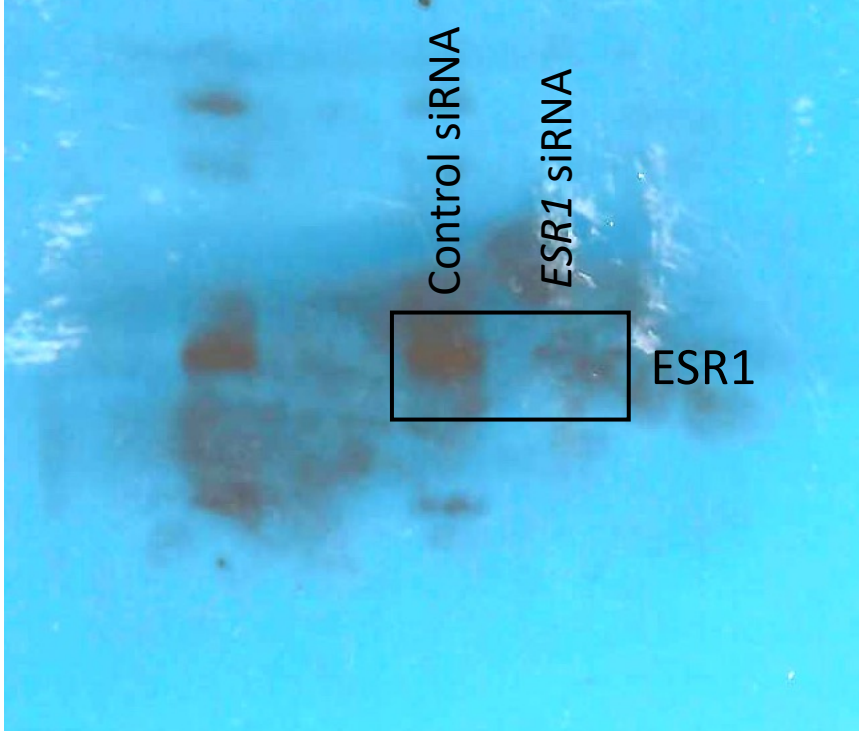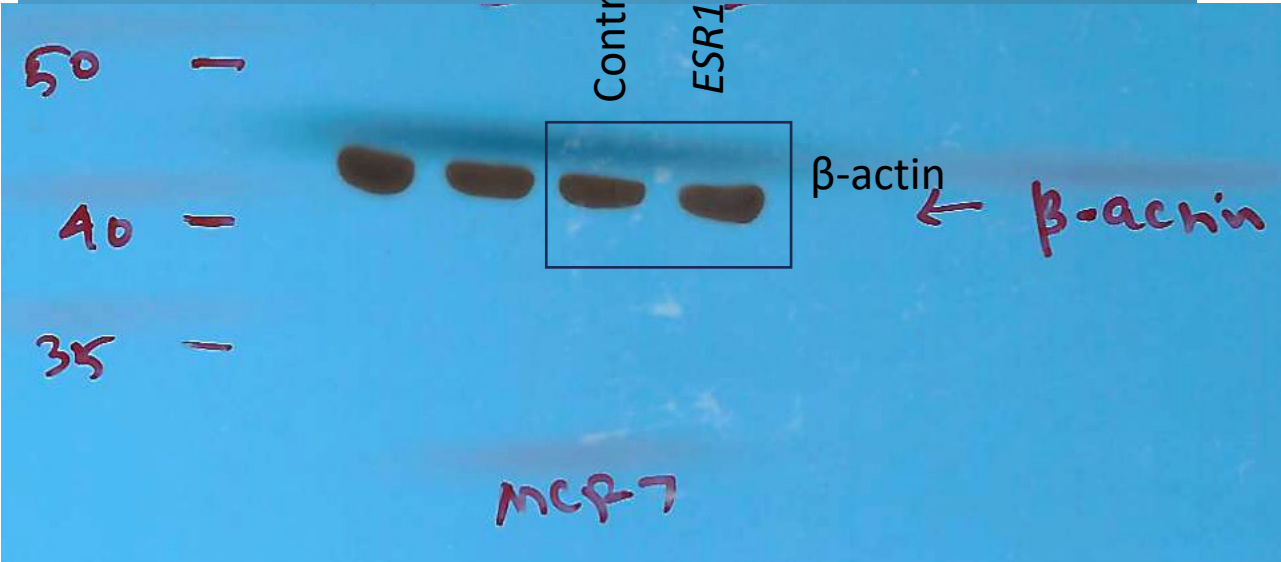

Full unedited blot for Figure 7E

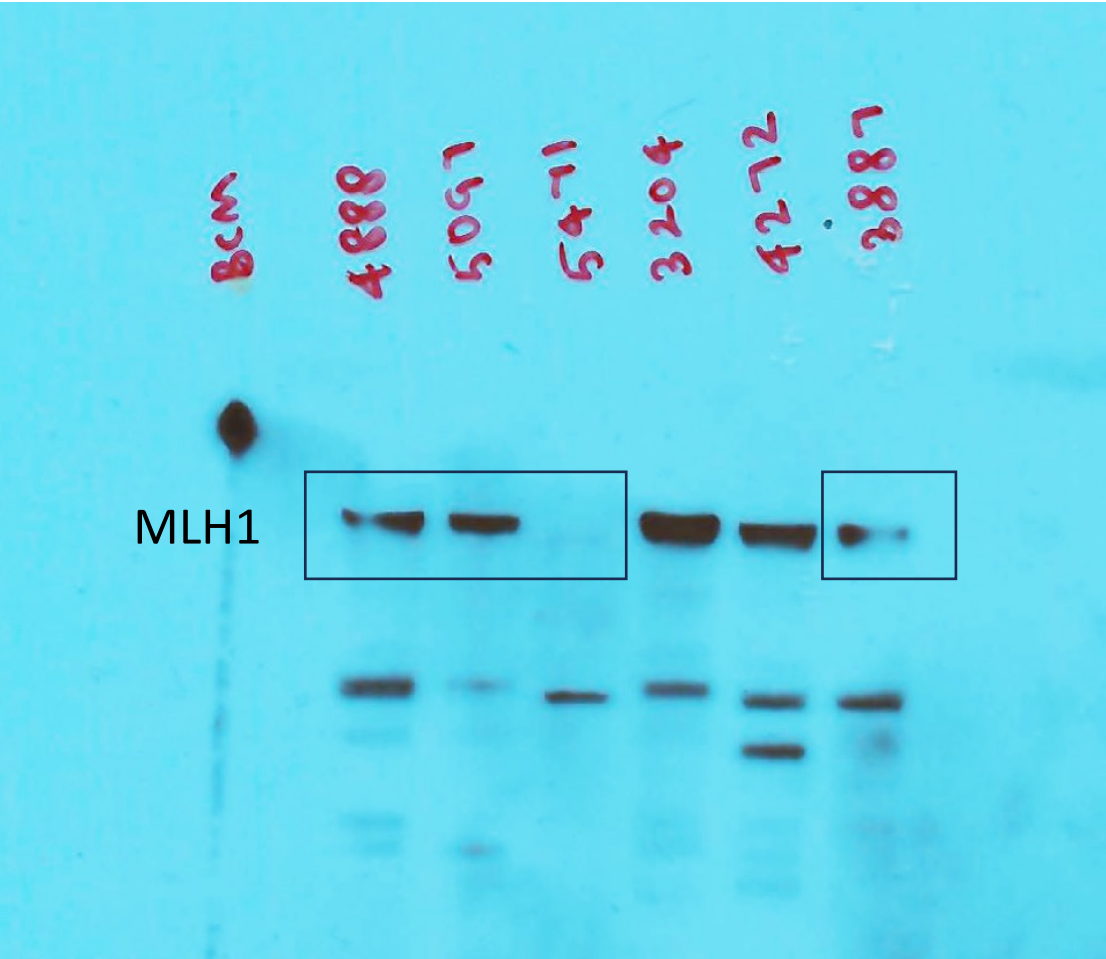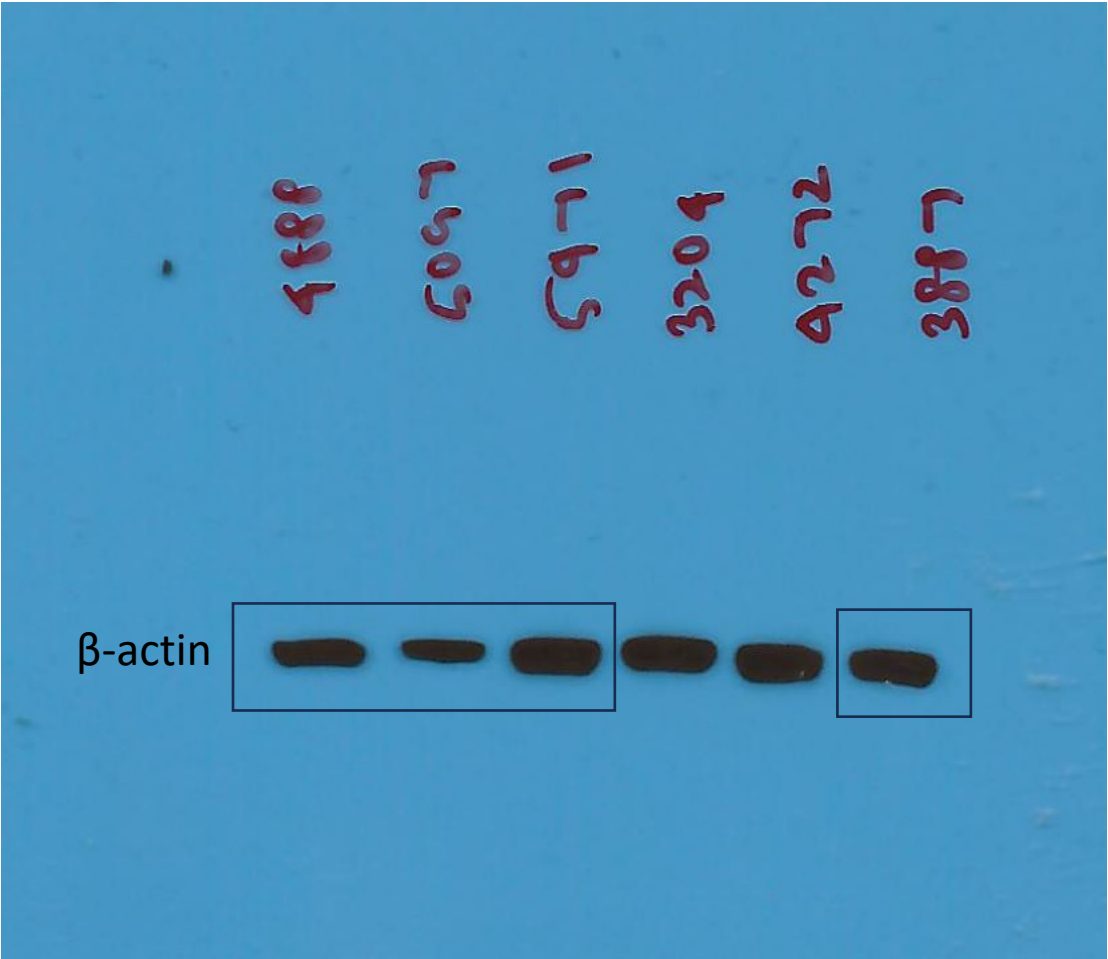

Full unedited  
blot for Figure 7J

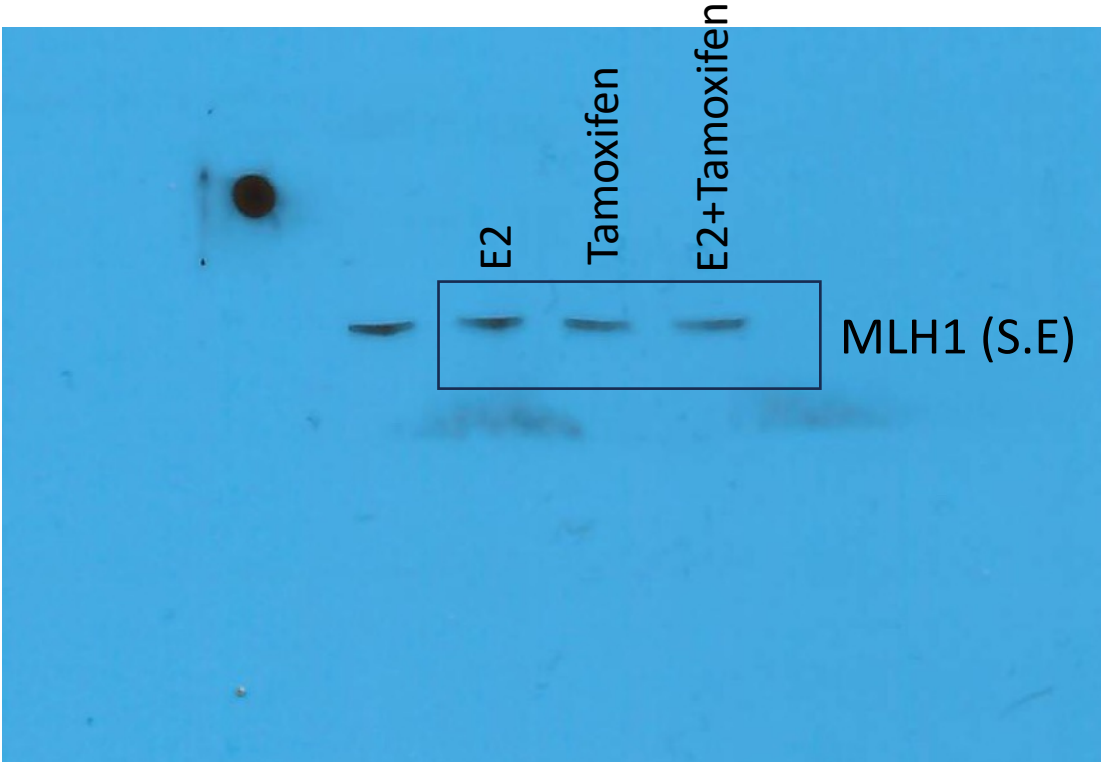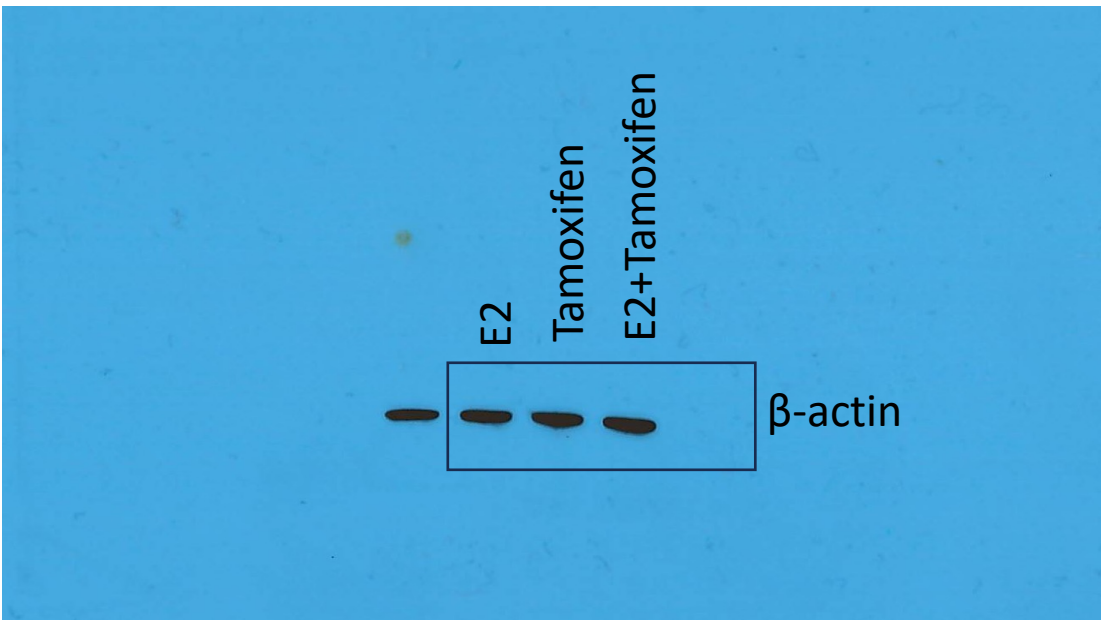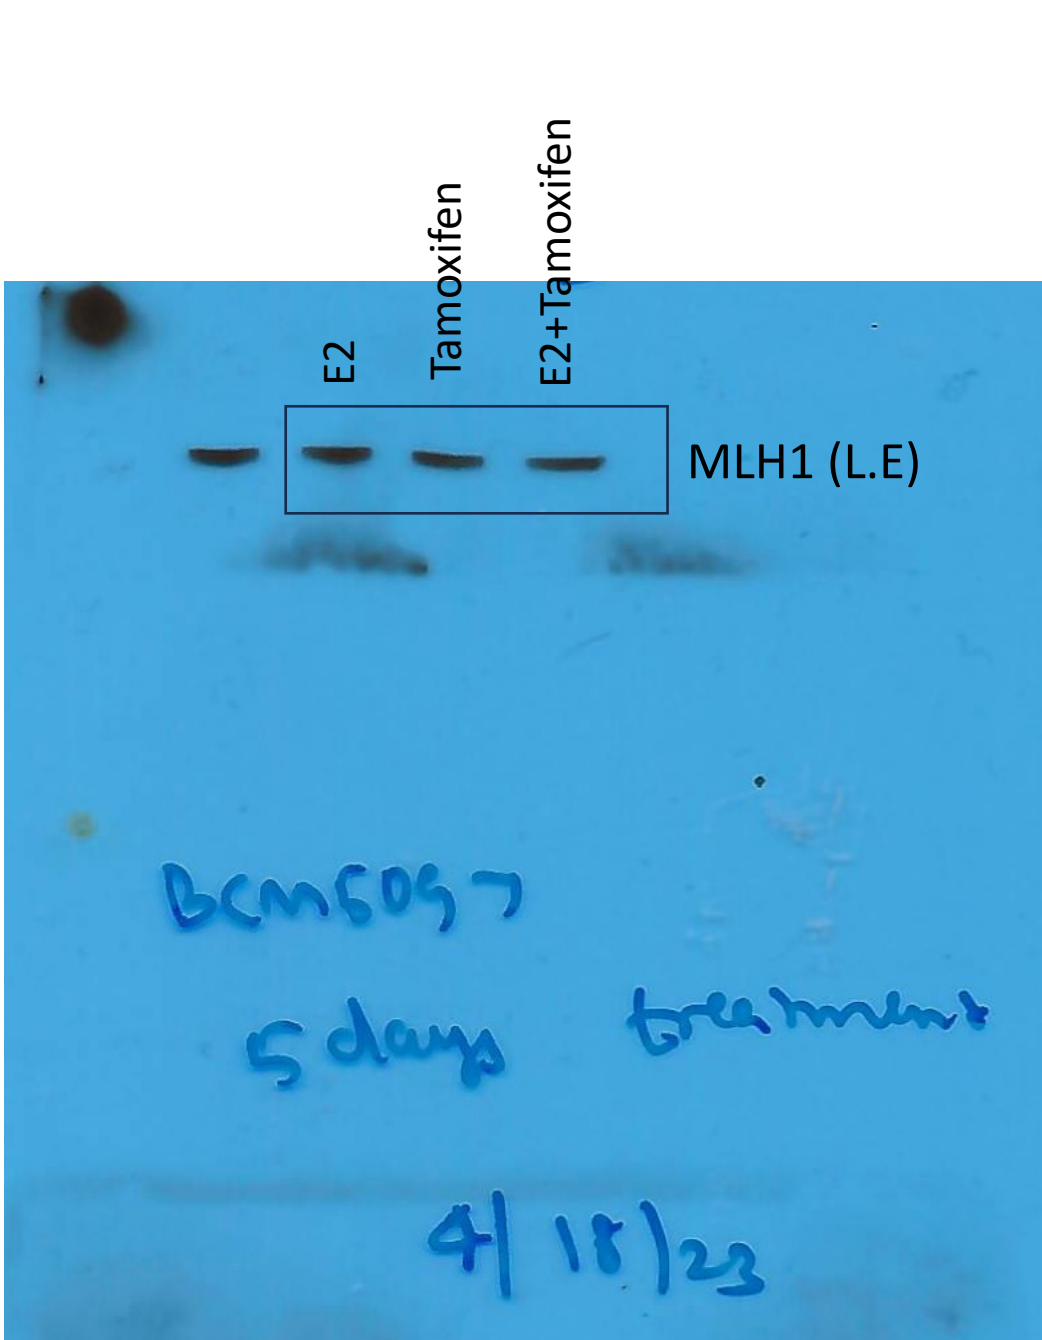

Supplement: sd2 [file 2]
